1 Cold induced changes in the envelope proteome

2 Author for contact details: Ekkehard Neuhaus

3 **Identification of chloroplast envelope proteins with critical importance for cold**  
4 **acclimation**

5  
6 Oliver Trentmann<sup>1\*</sup> OT, Timo Mühlhaus<sup>2\*</sup> TM, David Zimmer<sup>2</sup> DZ, Frederik Sommer<sup>3</sup> FS,  
7 Michael Schroda<sup>3</sup> MS, Ilka Haferkamp<sup>1</sup> IH, Isabel Keller<sup>1</sup> IK, Benjamin Pommerrenig<sup>1</sup> BP and H.  
8 Ekkehard Neuhaus<sup>1</sup> \*\* EN

9  
10 <sup>1</sup> Technische Universität Kaiserslautern, Department of Biology, Plant Physiology, P.O. Box 3049. 67653  
11 Kaiserslautern, Germany

12 <sup>2</sup> Technische Universität Kaiserslautern, Department of Biology, Computational Systems Biology, P.O.  
13 Box 3049, 67653 Kaiserslautern, Germany

14 <sup>3</sup> Technische Universität Kaiserslautern, Department of Biology, Molecular Biotechnology & Systems  
15 Biology, 67653 Kaiserslautern, Germany

16  
17 \* shared first authorship

18 \*\* to whom correspondence should be addressed:

19 Prof. Dr. Ekkehard Neuhaus, Technische Universität Kaiserslautern, Biology Department, Plant  
20 Physiology, P.O. Box 3049. 67653 Kaiserslautern, Germany Phone: \*49-631-2052372, Fax: \*49-631-  
21 2052600, Email: [neuhaus@rhrk.uni-kl.de](mailto:neuhaus@rhrk.uni-kl.de)

22  
23 One sentence summary: Differential proteome analysis allowed to identify envelope proteins critical for  
24 cold acclimation and frost tolerance in *Arabidopsis thaliana*.

25  
26 Authors contribution:

27 OT: chloroplast and envelope membrane purification, sample preparation for mass spectrometry, freezing tolerance  
28 experiments, data analysis and manuscript preparation. TM: study design MS, machine learning, data analysis,  
29 manuscript preparation. DZ: MS data processing and data analysis. FS: mass spectrometry-based protein  
30 identification. MS: mass spectrometry-based protein identification IH: edited the manuscript and completed the writing.  
31 IK: generated MEX1 overexpressor lines. BP: generated MEX1 overexpressor lines. EN: conceived the research plan,  
32 wrote manuscript, serve as the author responsible for contact and ensures communication.

33 Funding information: The work presented here was supported by the German Research Foundation (DFG) within the  
34 Collaborative Research Centre 175 (Transregio Sonderforschungsbereich 175)

35 **Abstract**

36 The ability of plants to cope with cold temperatures relies on their photosynthetic activity. This  
37 already demonstrates that the chloroplast is of utmost importance for cold acclimation and  
38 acquisition of freezing tolerance. During cold acclimation, the properties of the chloroplast  
39 change markedly. To provide the most comprehensive view of the protein repertoire of  
40 chloroplast envelope, we analysed this membrane system in *Arabidopsis thaliana* using MS-  
41 based proteomics. Profiling chloroplast envelope membranes was achieved by a cross  
42 comparison of protein intensities across plastid and the enriched membrane fraction both under  
43 normal and cold conditions. Multivariable logistic regression models the probabilities for the  
44 classification problem to address envelop localization. In total, we identified 38 envelope  
45 membrane intrinsic or associated proteins exhibiting altered abundance after cold acclimation.  
46 These proteins comprise several solute carriers, such as the ATP/ADP antiporter NTT2  
47 (substantially increased abundance) or the maltose exporter MEX1 (substantially decreased  
48 abundance). Remarkably, analysis of the frost recovery of *ntt* loss-of-function and *mex1*  
49 overexpressor mutants confirmed that the comparative proteome is well suited to identify novel  
50 key factors involved in cold acclimation and acquisition of freezing tolerance. Moreover, for  
51 proteins with known physiological function we propose scenarios explaining their possible role in  
52 cold acclimation. Furthermore, spatial proteomics introduces a novel layer of complexity and  
53 enabled the identification of proteins differentially localized at the envelope membrane under the  
54 changing environmental regime.

55

## 56 Introduction

57 No other plant cell organelle is so typically associated to the autotrophic lifestyle than the  
58 chloroplast. Chloroplasts of higher plants evolved from cyanobacteria and still contain a small,  
59 endogenous genome mainly encoding proteins located to the thylakoid membrane system  
60 (McFadden, 1999). These organelles are the cellular site of photosynthetic light reactions and  
61 oxygen release, they harbour the enzymatic machineries required for photosynthetic CO<sub>2</sub>  
62 fixation, for starch production, nitrite and sulphate reduction, and amino acid- and fatty acid  
63 synthesis (Buchanan, 2015).

64 To fulfil all these functions chloroplasts, must import and export a wide variety of metabolic  
65 intermediates (Weber et al., 2005) and they have to communicate with the nucleus to balance  
66 plastidic and nuclear gene expression (Pfalz et al., 2012). Accordingly, changing external  
67 parameters, such as light intensities or temperatures, result in substantial genetic and metabolic  
68 re-adjustments and it has been proposed that chloroplasts even serve as “sensors”, centrally  
69 positioned in the plants reaction to abiotic stress stimuli (Crosatti et al., 2013). The required  
70 molecular communication between chloroplasts and the nucleus takes place via retrograde and  
71 anterograde signalling processes (Kleine and Leister, 2013), while the altered metabolite  
72 exchange between the chloroplast and the cytosol depends among others upon corresponding  
73 changes in the envelope proteome.

74 Cold tolerant species can gain the capacity to survive freezing temperatures by a process  
75 termed “cold acclimation” (Catalá et al., 2011), starting when plants face cold but non-freezing  
76 temperatures. Accordingly, *Arabidopsis thaliana*, as a typical cold hardy species (Yano et al.,  
77 2005), represents a suitable tool for the investigation of molecular and physiological  
78 mechanisms underlying acclimation to low temperatures (Strand et al., 1997; Calixto et al., 2018;  
79 Nägele and Heyer, 2013; Schulze et al., 2012; Rekart-Cowie et al., 2008).

80 For following considerations, it appears likely that changes in the chloroplast envelope contribute  
81 to the ability of higher plants to acclimate rapidly to decreasing external temperatures. First,  
82 proper acclimation to cold depends on photosynthetic activity, providing sugars required for the  
83 toleration of low temperatures (Wanner and Juntila, 1999; Alberdi and Corcuera, 1991;  
84 Pommerrenig et al., 2018). Therefore, under cold conditions, chloroplasts must maintain,  
85 although at lower rates, the daytime export of triose-phosphates to allow sugar synthesis in the  
86 cytosol. Second, nocturnal starch degradation leads to the presence of glucose and maltose in  
87 the chloroplast stroma (Kötting et al., 2010; Sicher, 2011) and mutants with impaired starch

88 mobilization exhibit less freezing tolerance (Kaplan and Guy, 2004; Yano et al., 2005). Thus, we  
89 suppose that after onset of chilling temperatures, the export of glucose and maltose must be  
90 adapted to altered starch turnover. Third, for effective cryoprotection of thylakoid membranes  
91 raffinose must be imported into the chloroplast (Schneider and Keller, 2009; Knaupp et al.,  
92 2011). Fourth, in the cold, stromal sucrose is relocated to the cytosol where it contributes to the  
93 acquisition of a maximal freezing tolerance (Patzke et al., 2019). Fifth, to maintain enough  
94 membrane fluidity at low temperatures, cold acclimation induces the remodelling of structural  
95 lipids in thylakoids and envelope membranes (Barrero-Sicilia et al., 2017; Moellering et al.,  
96 2010).

97 To investigate putative changes in the protein composition caused by exposure of plants to cold  
98 temperatures several proteomic analyses have been carried out using in most cases total leaf  
99 extracts from the model plant *Arabidopsis*, the closely related species *Thellungiella* and also  
100 crop plants like Alfalfa and Wheat (Gao et al. 2009; Rocco et al. 2013; Amme et al. 2006; Awai  
101 et al. 2006; Chen et al. 2015; Kosová et al. 2013). Furthermore, the lumen and stromal proteome  
102 of isolated *Arabidopsis* chloroplast has been examined after plant exposure to 5°C for different  
103 time periods (Goulas et al. 2006).

104 Although our knowledge on cold-induced metabolic changes in chloroplasts and associated  
105 processes is quite comprehensive, it is completely unknown whether and to which degree  
106 alterations in the abundance of envelope located proteins contribute to cold acclimation. During  
107 the past two decades, the protein composition of the envelope membrane has been examined  
108 intensively. Particularly, studies by Ferro and co-workers (Ferro et al., 2003; Ferro et al., 2010)  
109 supported the establishment of AT\_CHLORO, a comprehensive and experimentally  
110 substantiated open access database for sub-plastidic protein localization (Bruley et al., 2012).  
111 This work has been extended very recently by a study unrevealing so far hidden components of  
112 the envelope membrane (Bouchnak et al. 2019)

113 To our knowledge, comparative studies reporting on alterations in the protein composition of the  
114 envelope membrane caused by environmental changes are missing. Because of the central role  
115 of the chloroplast in cold acclimation, we hypothesized that during this process, the protein  
116 content and composition of the envelope becomes modified. Therefore, we performed a  
117 comparative analysis of envelope proteins from cold treated plants and from plants permanently  
118 grown under standard conditions. We decided to conduct a label-free quantitative proteome  
119 study because the labelling of proteins during plant growth (e.g. <sup>15</sup>N labelling) requires  
120 hydroponic cultivation whereas plants for the label-free proteome study can be grown on soil and

121 thus under more natural conditions. It is important to mention that the label-free approach has its  
122 specific limitations. However, these limitations can be minimized using more biological replicates  
123 and extensive statistical analyses (Trentmann and Haferkamp, 2013).

124 To affirm the physiological relevance of identified changes in protein abundances we exemplarily  
125 investigated the gain of frost tolerance after cold acclimation for two candidate proteins with  
126 opposite abundance changes using loss of function or gain of function mutants.

127

## 128 **Results**

### 129 **Envelope membrane purification and mass spectrometry**

130 The isolation of intact chloroplasts from cold acclimated plants and control plants was performed  
131 according to Kunst et al. (Kunst, 1998) with some marginal modifications. Particularly, the initial  
132 disruption of the leave tissue with a commercial electric blender turned out to be a critical step  
133 since even slightly prolonged pulsing periods resulted in a dramatically decreased chloroplast  
134 yield. The intactness of chloroplasts was determined by phospho-glucose-isomerase (PGI)  
135 enzyme assay. PGI activity of intact was normalized to that of disrupted (set to 100%)  
136 chloroplasts. The intactness generally ranged between 85% and 95% (Supp. Fig. S1B). This  
137 observation suggests that the quality of the isolated chloroplasts is not affected by the used  
138 cultivation temperatures (see also Supp. Fig. S1A), an important prerequisite for the subsequent  
139 isolation of the envelope membranes. The three-step sucrose gradient led to a yellowish band  
140 without visible chlorophyll contaminations, which is indicative for no, or only minor  
141 contaminations with thylakoid membranes. The appearance of this envelope fraction generally  
142 resembled that reported by Ferro (Ferro et al., 2003). Because of the increased detection  
143 sensitivity of mass spectrometry, we could reduce the amount of leaf material per single isolation  
144 from about 500 g (as reported by Ferro et al. 2003) to 200 g. Purified envelope membranes were  
145 collected by ultracentrifugation and finally washed five-times with 1M sodium carbonate. Sodium  
146 carbonate treatment allows removal of soluble proteins weakly attached to membranes (Kim et  
147 al., 2015). By this approach, we obtained about 5 µg envelope membrane proteins from 200 g  
148 Arabidopsis leaves. Proteins of total chloroplast lysates and of the envelope membrane fraction  
149 from cold-acclimated and non-acclimated plants were separated by SDS-Page. Subsequent to  
150 in-gel tryptic digestion, the resulting peptides in the different samples were analysed by nanoLC-  
151 MS/MS. The proteome analysis of chloroplasts and envelopes from cold and non-acclimated  
152 plant identified 905 proteins in total (Supplement Table S1).

## 153 **Envelope membrane protein profiling**

154 We used spatial proteomics for envelope membrane protein profiling. The principle of this  
155 technique is to fractionate organelles or sub-compartments and to identify the distribution of  
156 proteins across the differentially enriched sub fractions. Here, we compared the protein  
157 occurrence in the chloroplast fraction with that in the envelope fractions from standard and cold  
158 cultivated plants. Envelope located proteins generally should be present in both fractions (total  
159 chloroplast lysate and enriched envelopes) but should be enriched in the envelope preparation,  
160 whereas non-envelope proteins should be depleted from this fraction. Consequently, comparing  
161 protein abundances in the two fractions already allows the calculation of an enrichment factor for  
162 the envelope located candidates. In order to model the probabilities for the classification of the  
163 identified proteins, either envelope or not, we applied multivariable logistic regression. Combined  
164 information from AT\_CHLORO (Bruley et al., 2012) and the Plant Proteome Database (Sun et  
165 al., 2009) revealed high quality localization data for 453 of the 905 identified proteins, with 162  
166 being assigned to the envelope and 291 to an alternative location (either stroma or thylakoid).  
167 The corresponding proteins were chosen as markers for the training of our classifier (localization  
168 data and enrichment factors).

169 Cold temperatures are known to alter the lipid content and composition of cellular membranes in  
170 plants. In order to exploit possible temperature-induced changes in the membrane structure  
171 affecting protein extraction, we used both enrichment factors and additionally incorporated a  
172 subset of physiochemical amino-acid properties with minimal redundancy, while retaining  
173 maximum relevance using a minimum spanning tree approach (Zimmer et al., 2018). After  
174 training, we reached 97.82 % prediction accuracy accessed by 10-fold cross validation.

175 The graphical representation of the score distribution demonstrates that the chosen parameters  
176 allows the discrimination between envelope and non-envelope located proteins with quite high  
177 accuracy (Figure 1). Most non-envelope proteins exhibit negative score values whereas  
178 envelope proteins occur with higher frequency at positive scores. Consequently, proteins with  
179 ambiguous or unknown localization can be assigned to the envelope or non-envelope group  
180 according to their individual score values. We analysed the score behaviour of all 905 identified  
181 proteins to check for eventual envelope localization. For this, we tolerated a false discovery rate  
182 of 5% and thus the score value of 0.92 was chosen as cut-off. By this strategy, 207 of the  
183 originally identified proteins could be annotated as envelope located (Supplement Table S1 and  
184 Figure 2). The overall quality of our proteome study is given by the pie chart in Figure 2. Here

185 the localization of the identified proteins described by hierarchically organized localization  
186 ontology.

### 187 **Cold temperatures alter the protein repertoire of the envelope membrane**

188 The central role of the chloroplast in cold acclimation led us to the assumption that exposure of  
189 Arabidopsis to low temperatures might alter the amount and composition of proteins in the  
190 envelope membrane. Accordingly, envelopes from cold treated plants might contain proteins that  
191 have not been assigned to this localization before, because they are missing or of very low  
192 abundance and thus were not detected in the chloroplast envelope of plants grown under  
193 optimal culture conditions. Moreover, one might envision that certain chloroplast proteins are  
194 differently located under varying environmental regimes. Spatial proteomics allow insights into  
195 the cellular organization as well as in the dynamics of the subcellular distribution of proteins and  
196 might also help to identify novel envelope proteins, particularly in the cold treated plants.

197 First, we compared the envelope protein levels of cold acclimated plants with those of control  
198 plants. This analysis revealed that cold treatment changed the abundance of approximately 20%  
199 (38 of 207) of the identified envelope proteins (Table 1). Most of these proteins (35 out of 38)  
200 showed lower abundance. It is imaginable that cultivation of plants under cold temperatures  
201 decreases the amount of the detected envelope proteins either due to a generally decelerated  
202 protein synthesis or due to lesser efficient extraction from the corresponding membranes.  
203 However, the facts that the individual proteins exhibit different degrees in reduction and that at  
204 least three proteins were even of substantially higher abundance (log<sub>2</sub>FC from 7.46 to 10.07)  
205 contradicts this assumption (Table 1). Interestingly, one of the three proteins with increased  
206 abundance was previously not assigned to the envelope location (ABCF5/GCN5, *At5g64840*).  
207 Moreover, also the set of proteins that decreased after cold treatment contained two novel  
208 envelope candidates (BCA1, *At3g01500*; ABCB24/ATM2, *At4g28620*).

209 To analyse whether the differently abundant envelope proteins are intrinsic to the membrane we  
210 checked for possible membrane spanning domains. For this, we manually curated the  
211 information from AT\_Chloro, and the Plant Proteome Database with data obtained from  
212 ARAMEMNON (release 8.1) and diverse publications. For instance, the list of envelope  
213 membrane proteins (Table 1) contains four members of the mitochondrial carrier family (BT1  
214 *At4g32400*; SAMC1, *At4g39460*; SAMTL, *At2g35800* and MFL1, *At5g42130*). These carriers  
215 were initially proposed to contain no or a lower number of TMs. However, members of this  
216 protein family are classified by their common basic structure, which amongst others comprises



217 six transmembrane domains (TMs) (Haferkamp and Schmitz-Esser, 2012). Therefore, we  
218 corrected the corresponding information accordingly. Manual curation of the previous data led to  
219 the identification of alpha helical domains in 26 out of the 38 envelope proteins. The list of  
220 differentially abundant proteins also contains two outer envelope proteins (OEP23 *At2g17695*  
221 and OEP24 *At5g42960*). OEP23 and OEP24 exhibit amphiphilic helices or a  $\beta$ -barrel  
222 confirmation and act as cation and anion channels, respectively (Goetze et al., 2015; Röhl et al.,  
223 1999). Accordingly, at least 28 of the 38 differentially abundant envelope proteins show features  
224 of membrane intrinsic proteins.

225 The remaining ten proteins are considered as rather soluble and the fact that they were not  
226 removed by sodium carbonate suggests that they are tightly attached to the membrane. This  
227 membrane association might result from a specific interaction with a membrane intrinsic protein.  
228 TGD3 (*At1g65410*) for example represents the ATPase subunit of the lipid transporter TGD and  
229 by this is apparently fixed to the membrane. Moreover, Tic22-IV is part of the protein import  
230 machinery, and thus might interact not only physiologically but also physically with membrane  
231 components of the TIC complex. RAB-B1b is a putative RAB-B-class small GTPase. Generally,  
232 RAB proteins are post-translationally modified by prenylation and RAB-B1 contains a  
233 geranylgeranylation motif (Maurer-Stroh and Eisenhaber, 2005). Consequently, RAB-B1, just  
234 like other RAB proteins, can be considered as a peripheral membrane protein, which is  
235 temporarily anchored to a membrane via its lipid group but can be released from this location  
236 during the GTPase cycle. Interestingly, a proteome study revealed that the putative aspartate  
237 carbamoyltransferase is palmitoylated (Hemsley et al., 2013) and thus might be attached to the  
238 envelope via its lipid anchor. Moreover, a palmitoylation site is predicted for the putative plastid-  
239 specific ribosomal protein (PSRP5 *At3g56910*) (Ren et al., 2008). Since the remaining five  
240 proteins lack clearly predicted lipid modification motifs, their membrane association might be  
241 caused by an interaction with a membrane protein.

242 By the help of the known or predicted physiological function, we aimed to affiliate the differently  
243 abundant envelope proteins to functional groups. A high number (19 out of the 38) of the  
244 envelope proteins are associated to the metabolite and protein translocation. The substrates of  
245 the corresponding proteins are heterogeneous and range from ions (like potassium of Pollux-L1;  
246 *At5g02940*) to comparatively large and complex molecules, like lipids (TGD subunits TGD2 and  
247 3) or protein precursors. From the 19 transport associated envelope proteins only ATP/ADP  
248 transporter NTT2 (*At1g15500*; log<sub>2</sub>FC +9.7) increased whereas the majority decreased after  
249 onset of cold (Table 1). The lipid transporter subunit TGD3, the ABC-type transporter ABCG7  
250 (*At2g01320*), OEP23, the maltose exporter MEX1 (*At5g17520*) and the phosphoenolpyruvate/Pi



251 exchanger PPT1 (*At5g33320*) are substantially decreased in abundance (log<sub>2</sub>FC -7.74 to -  
252 11.06). By contrast, the remaining envelope proteins associated to translocation rather exhibit  
253 minor reductions in their abundance, ranging from log<sub>2</sub>FC of -0.76 for the phytyltransferase  
254 TIC55-II (*At2g24820*), a putative component of the TIC machinery to log<sub>2</sub>FC of -2.07 for the S-  
255 adenosylmethionine transporter SAMC1 (*At4g39460*).

256 Interestingly, even though both, NTT2 (*At1g15500*) and BT1 (*At4g32400*), accept adenine  
257 nucleotides as substrates cold exposure led to opposed changes in their abundances (Table 1).  
258 In this context, however it is important to mention that they fulfil different physiological functions.  
259 NTT2 imports ATP in exchange with ADP plus phosphate and by this provides chemical energy  
260 to the plastid (Tjaden et al., 1998; Kampfenkel et al., 1995; Reinhold et al., 2007; Trentmann et  
261 al., 2008) whereas BT1 represents a uniporter and exports newly generated adenine  
262 nucleotides to the cytosol (Kirchberger et al., 2008).

263 The chloroplast inner envelope harbours three sugar transport proteins, the glucose transporter  
264 pGlcT (*At5g16150*), the sucrose exporter pSuT (*At5g59250*) and the maltose exporter MEX1  
265 (*At5g17520*) (Weber et al., 2000; Patzke et al., 2019; Niittylä et al., 2004). Although sugars play  
266 an important role in cold acclimation (Pommerrenig et al., 2018; Kaplan et al., 2006) and  
267 although all three sugar transporters have been identified in the envelope proteome  
268 (Supplement Table S1), solely the abundance of MEX1 changed and in fact became reduced by  
269 the cold treatment (Table 1; log<sub>2</sub>FC -9.0).

270 Out of the 38 differentially abundant proteins four are clearly involved in fatty acid and lipid  
271 metabolism (Table 1). The J-like protein CJD1 (*At1g08640*) influences the composition of  
272 chloroplast lipids (Ajjawi et al., 2011) whereas TGD2 (*At3g20230*) and TGD3 (*At1g65410*)  
273 represent subunits of the phosphatidic acid transfer complex TGD (Lu et al., 2007), and FAX1  
274 (*At3g57280*) mediates fatty acid export (Li et al., 2015a). Moreover, because the  $\alpha/\beta$  hydrolase  
275 superfamily comprises proteases, dehalogenase, peroxidases as well as epoxide hydrolases,  
276 lipases and esterases, the putative alpha/beta-fold-type hydroalase (*At3g10840*) might also be  
277 associated to lipid and sterol metabolism (Ollis et al. 1992). While the latter enzyme and TGD3  
278 are highly reduced in their abundance, the remaining three proteins showed comparatively low  
279 decrease during cold exposure. Moreover, also the cytosolic located RAB-B-class small GTPase  
280 RAB-B1b (*At4g17170*) might indirectly join the group of lipid metabolism associated proteins,  
281 since this class of proteins modifies intracellular membrane fluxes and by this lipid composition  
282 (Karim and Aronsson, 2014). The alterations in the abundances of envelope proteins involved in

283 lipid homeostasis might be causative for cold-induced changes in the membrane lipid  
284 composition of the chloroplast and the surrounding cell (Barrero-Sicilia et al., 2017).

285 Tocopherols are cellular antioxidants that protect fatty acids from peroxidation and by this may  
286 stabilize chloroplast membranes also during freezing (Hincha, 2008). Therefore, it was surprising  
287 that two proteins of the tocopherol biosynthesis, VTE6 (*At1g78620*) and VTE3 (*At3g63410*) were  
288 of lower abundance in cold treated plants (Mène-Saffrané, 2017; Fritsche et al., 2017). Apart  
289 from one enzymatic reaction, the synthesis of vitamine E components (comprising tocopherols,  
290 tocotrienols and plastochromanols) takes place at the inner envelope membrane (Cheng et al.,  
291 2003; van Wijk and Kessler, 2017). Because of their role in the protection of fatty acids, VTE3  
292 and VTE6 were affiliated to the functional group of envelope proteins associated to membrane  
293 lipid modification.

294 Finally, 24 proteins showed a quite moderate alteration in the abundance ( $\log_2FC$  between -2  
295 and +2) whereas 14 show substantial changes ( $\log_2FC < -7$  or  $> 7$ ) and include all three proteins  
296 that increase in response to cold. To investigate whether the obtained data allow insights in the  
297 physiological relevance of altered proteins in cold acclimation we analysed two proteins with  
298 opposed changes in their abundance in more detail.

299

300 **Cold acclimation requires sufficient energy translocation across the inner plastid**  
301 **envelope**

302 Low temperatures result in photoinhibition and consequently cold acclimation is accompanied by  
303 a limited plastidic ATP synthesis (Khanal et al., 2017). However, cold induced adaptations of  
304 thylakoid proteins, pigments or inner envelope composition essentially rely on sufficient ATP  
305 availability. NTT type carriers of higher plants act as ATP/ADP transporters and were shown to  
306 mediate energy provision to heterotrophic plastids as well as to autotrophic chloroplasts under  
307 conditions of missing or reduced photosynthetic activity (Reinhold et al., 2007; Kirchberger et al.,  
308 2008; Tjaden et al., 1998; Reiser et al., 2004). The comparative proteome study revealed that  
309 the abundance of NTT2 substantially increases in response to cold temperatures ( $\log_2FC +9.7$ ,  
310 Table 1). Therefore, cold-induced limitations in photosynthetic energy production are apparently  
311 compensated by increased NTT-mediated ATP uptake from the cytosol. To test whether NTT  
312 activity is indeed required for proper cold acclimation we made use of NTT loss-of-function  
313 mutants. The Arabidopsis genome encodes two *ntt* isoforms and thus we analysed cold  
314 acclimation and acquisition of freezing tolerance in the corresponding single (*ntt1* and *ntt2*)

315 mutants as well as in the double (*ntt1/2*) mutant (Reiser et al., 2004). After six weeks of growth  
316 at ambient conditions, *ntt1* and *ntt2* do not exhibit altered phenotypic appearance when  
317 compared to correspondingly grown wild type plants (WT). The double *ntt1/2* mutants however  
318 were slightly smaller (Figure 3B upper row).

319 Moreover, the cold acclimation study revealed that after recovery from freezing, all three mutant  
320 lines exhibited more wilted leaves than the WT (Figure. 3A and C). The WT lost in average 4.2  
321 leaves per plant, whereas *ntt1*, *ntt2* and *ntt1/2* lost 6, 8.0 and 8.5 leaves per plant, respectively.  
322 The increased leave damage of plants lacking either NTT1 or NTT2 indicates that the activity of  
323 only one NTT isoform does not suffice to obtain proper freezing tolerance. Moreover, the  
324 observation that *ntt2* mutants exhibit more wilted leaves per plant than *ntt1* mutants and almost  
325 reach the number of dead leaves per plant of the double *ntt1/2* mutant suggests that NTT2 is of  
326 higher importance for cold acclimation than NTT1.

327

### 328 **Prevention of plastidic maltose export is required for proper freezing tolerance**

329 It is well known that a tightly balanced cellular sugar- and starch homeostasis is critical for the  
330 plant's capability to tolerate low or freezing temperatures (Nägele and Heyer, 2013;  
331 Pommerrenig et al., 2018). MEX1, the sole maltose exporter of the chloroplast was shown to  
332 play an important role in starch turnover and thus in the connection of starch and sugar  
333 metabolism (Purdy et al., 2013; Ryoo et al., 2013; Niittylä et al., 2004). Interestingly, cold  
334 exposure led to considerable depletion of this transport protein from the envelope proteome  
335 (log<sub>2</sub>FC -9.0, Table 1). Moreover, leaves of MEX1 loss-of-function mutants (*mex1-1*) were  
336 shown to exhibit metabolic features of cold acclimation already in the warm (Purdy et al., 2013).  
337 These observations imply that elevated maltose levels in the plastid are required for proper cold  
338 acclimation. Consequently, a constantly high maltose export activity might cause perturbations in  
339 cold acclimation. To test this hypothesis, we generated mutant plants overexpressing *mex1* and  
340 analysed their capacity to cope with freezing temperatures. For this, *mex1-1* mutants (Niittylä et  
341 al., 2004) were transformed with an expression construct carrying the structural *mex1* gene  
342 under control of the ubiquitin 10 promotor. Two strong overexpressor lines, *pUBQ10::MEX1* lines  
343 1 and 2 (termed *pUBQ10::MEX1-1* and *pUBQ10::MEX1-2* respectively) were chosen for further  
344 studies (Supp. Fig. S2)

345 As previously shown, *mex1-1* mutants are highly impaired in growth when compared to the WT  
346 (Supp. Fig. S2) (Purdy et al., 2013; Niittylä et al., 2004) The two *mex1* overexpressor lines

347 however grew much larger than *mex1-1* and showed WT appearance (Supp. Fig. S2). The fact  
348 that overexpressing *mex1* complemented the dwarf phenotype of the original *mex1-1* mutant  
349 demonstrates that the introduced maltose transporter is functional (Supp. Fig. S2).

350 The cold acclimation study revealed that, although massively impaired in growth, the *mex1-1*  
351 mutant recovers quite well from freezing (Figure 4A). For quantitative evaluation of the freezing  
352 damage, we counted the wilted leaves of the individual plants. While WT plants exhibit 2.9 wilted  
353 leaves per plant in the mean, the number is only marginally increased (3.5 in the mean) in *mex1-1*  
354 plants (Figure 4B). By contrast, the two *mex1* overexpressor lines are much more affected  
355 (Figure 4B) and show a significantly higher amount of wilted leaves per plant than the WT or  
356 *mex1-1*. An average of 6.3 and 5.8 leaves per plant of the *pUBQ10::MEX1-1* line and  
357 *pUBQ10::MEX1-2* line wilted from freezing, respectively (Figure 4). This result demonstrates that  
358 the overexpression of *mex1* results in higher susceptibility of the plants to cold stress and  
359 supports the idea that elevated maltose levels inside the chloroplast are required for cold  
360 acclimation.

361

362 **Assessing the cold acclimation dependent differential localization of envelope**  
363 **associated soluble proteins**

364 By using ratio-metric measurements comparing protein-specific enrichment factors under normal  
365 and cold conditions of the envelope (sub)-proteome (Supplement Table S1), we were able to  
366 access cold dependent differential localization by mass spectrometry. Proteins with a positive  
367 log<sub>2</sub>FC change determined by the factor of their enrichment exhibit a higher abundance in the  
368 envelope fraction under cold treatment and vice versa. Superimposing the information about  
369 envelope localization for proteins that do not have any known transmembrane helices or other  
370 established transmembrane domains, dynamic differential localization due to cold becomes  
371 apparent (Figure 5 and Table 2). Therefore, an abundance increase determined by enrichment  
372 factor under cold conditions points to a conditional association of the proteins to the envelope  
373 membrane while a decrease in abundance suggests membrane dissociation. In total we were  
374 able to identify 24 non-intrinsic envelope proteins exhibiting a cold-acclimation dependent  
375 differential localization (q-value ≤ 0.05) without changes in abundance (Table 2). For three of  
376 these the changes are rather small and may have no biological relevance (Figure 5 grey dots)  
377 even though these changes are statistically relevant.

378 Interestingly, beside these two groups, there is a cluster of 5 proteins (decreased abundance)  
379 with a strong correlation between the differential localization and the overall change in protein  
380 abundance under cold (Figure 5 cluster indicated by the oval circle and Table 3). It seems that  
381 those proteins compensate for the global protein reduction during cold treatment by associating  
382 to membrane following their biochemical binding equilibrium. However, proteins showing  
383 differential localization that does not occur with a change in abundance might be modulated in  
384 their functional capacity. Additionally, there is one single protein with a high increase in  
385 abundance and a compared to the other 5 proteins exhibits a rather small differential localization  
386 (diffloc – 1.07, Figure 5 grey dot).

387 Among the identified proteins exhibiting a cold induced differential localization at the envelope  
388 membrane are several interesting candidates (Figure 5). At least two of these can be assigned  
389 to fatty acid, lipid-metabolism/modification: the chalcone isomerase-(CHI)-fold fatty-acid binding  
390 protein FAP1 (*At3g63170*) and the GDSL esterase/lipase (*At1g11320*). In Arabidopsis out of five  
391 so far characterized CHI-fold proteins three of these locate to the chloroplast and have been  
392 identified as fatty acid binding proteins (FAPs). They are highly expressed during increased fatty  
393 acid storage and knockout plants show elevated  $\alpha$ -linolenic acid levels (Ngaki et al., 2012).  
394 GSDL lipolytic enzymes belong to a family of lipid hydrolysis enzymes widely existing in bacteria  
395 and plants (Lai et al., 2017). According to our analysis both proteins seem to dissociate from the  
396 envelope membrane during cold acclimation. An analogous behaviour has been observed by us  
397 for two proteins belonging to the subfamily I of the ABC protein family (*AtABC111/AtNAP14*  
398 *At5g14100* and *AtABC110/AtNAP13 At4g33460*). Both are so called soluble non-intrinsic ABC  
399 proteins consisting solely out of one nucleotide binding site (Sánchez-Fernández et al., 2001)  
400 and one of these, NAP14, has already been characterized as involved in transition metal  
401 homeostasis. Disruption of the *nap14* gene results in over-accumulation of transition metals (Fe,  
402 Co, Cu, Zn and Mo) and abnormal chloroplast structures (Shimoni-Shor et al., 2010). However,  
403 the physiological role of NAP13 is so far unknown.

404 One of the proteins that exhibiting an increased attachment to the envelope membrane after cold  
405 is part of the tetrapyrrole pathway generating chlorophyll (*AtHEME2 At2g40490*). The enzyme  
406 uroporphyrinogen decarboxylase (UROD) converts uroporphyrinogen III into  
407 coproporphyrinogen III which is then further converted to protoporphyrin IX (Terry and Smith,  
408 2013). Depletion of UROD leads to reduction of the tetrapyrrole biosynthesis and light  
409 dependent necrosis (Mock and Grimm, 1997).

410

## 411 **Discussion**

412 Our proteome study revealed cold-induced changes in the abundance of 38 envelope proteins.  
413 Although only three of these proteins increased in abundance, the corresponding alterations  
414 were considerably high and exhibited log<sub>2</sub>FC of 7.4 to 10.1. Moreover, among the 35 proteins of  
415 decreased abundance, 11 were highly reduced whereas the remaining 24 showed only  
416 moderate changes. The extreme positive or negative FC values apparently result from the very  
417 low abundance of the corresponding envelope proteins either under control or cold conditions.  
418 Therefore, the detection limit of the mass spectrometer apparently causes a certain degree of  
419 overestimation of their abundance changes. Independent of a possible overestimation, the  
420 observation that the amount of a very low abundant protein substantially increased is indicative  
421 for its stimulated synthesis whereas the almost complete disappearance of a highly abundant  
422 protein implies its effective degradation during cold exposure. One might envision that the  
423 moderate reduction of 24 envelope proteins results from a general reduction in protein  
424 biosynthesis due to the cold temperatures. However, because most envelope proteins remained  
425 unaffected by the cold treatment, it is likely that the observed abundance changes, either  
426 moderate or massive, are specific. In the following, we discuss the role of several altered  
427 proteins in cold acclimation.

428

## 429 **Energy provision to the chloroplast is required for proper freezing tolerance**

430 Cold exposure initially results in decreased photosynthesis, which limits energy production in the  
431 chloroplast (Khanal et al., 2017). Therefore, metabolic processes in the stroma rely on additional  
432 energy provision from the cytosol. The antiporters NTT1 and NTT2 generally mediate ATP  
433 uptake into the stroma and play a central role particularly when photosynthetic energy  
434 production is insufficient (short day conditions) or missing (heterotrophic plastids) (Reinhold et  
435 al., 2007; Tjaden et al., 1998). Therefore, the considerable cold-induced increase in the  
436 abundance of NTT2 (+ 9.7 of 2-fold, Table 1) might lead to a stimulated ATP uptake from the  
437 cytosol. Here we demonstrate that absence of NTT2 or of both NTTs (Reiser et al., 2004) results  
438 in a substantially higher sensitivity of the corresponding mutant plants to freezing (Figure 3). This  
439 observation demonstrates that, cold acclimation relies on NTT mediated ATP supply to the  
440 chloroplast. The increased abundance of NTT2 most likely guarantees the energization of  
441 metabolic processes required for cold acclimation, such as the generation of starch or fatty acid  
442 synthesis.



443

#### 444 **Cold acclimation involves blockage of plastidic maltose export**

445 Sugars are important cryoprotectants, allow vitrification of membranes after water removal and  
446 quench ROS efficiently, and thus fulfil important functions during cold acclimation and acquisition  
447 of freezing tolerance. It is well known that photosynthetic carbohydrate fixation is essential for  
448 sugar accumulation in response to cold (Wanner and Juntila, 1999). However, several reports  
449 suggest that also starch breakdown contributes to the development of freezing tolerance,  
450 particularly during the early phase of low temperature exposure (Kaplan et al., 2006; Yano et al.,  
451 2005). Starch degradation generally results in the release of maltooligosaccharides and finally  
452 maltose. Although starch degradation seems to be prerequisite, it remained unclear whether the  
453 released maltose or maltose-derived compounds mediate proper cold acclimation and  
454 cryoprotection of the photosynthetic electron transport chain (Kaplan et al., 2006; Yano et al.,  
455 2005).

456 Maltose generally leaves the chloroplast via the transporter MEX1 (Niittyälä et al., 2004).  
457 Interestingly, cold exposure led to considerable depletion of MEX1 from the envelope membrane  
458 (-9.0 log<sub>2</sub>FC, Table 1). This observation points to a prevention of maltose export from the plastid  
459 during cold temperatures. To gain deeper insights into the role of plastidic or cytosolic maltose in  
460 cold acclimation we generated plants constantly overexpressing MEX1. The reduced tolerance  
461 of the corresponding mutants against freezing (Figure 4) suggests that not only maltose release  
462 from starch degradation but also its trapping in the chloroplast is required for acquisition of  
463 proper freezing tolerance. This conclusion is supported by the fact that, although cellular maltose  
464 levels rise in response to high and low temperatures solely at low temperatures maltose  
465 accumulates in the chloroplast (Kaplan and Guy, 2004; Lu and Sharkey, 2006).

466

#### 467 **Cold-induced changes in the lipid transfer across the chloroplast envelope**

468 Cold exposure led to substantial changes in the relative abundance of several proteins  
469 associated with fatty acid (FA) and lipid metabolism. In fact, the modification of the chloroplast  
470 lipid composition is a *conditio sine qua non* for the acclimation and adaptation to low  
471 temperatures (Barrero-Sicilia et al., 2017; Li-Beisson et al., 2010). The synthesis of glycerolipids,  
472 which represent the major lipid constituents of plant membranes, takes place in two different  
473 compartments (Li-Beisson et al., 2010). The prokaryotic type of glycerolipid synthesis in the



474 chloroplast gives rise to lipids almost exclusively carrying C16 fatty acids at the sn-2 position of  
475 the glycerol backbone, whereas the eukaryotic pathway at the endoplasmic reticulum generally  
476 produces glycerolipids with C18 fatty acids at the sn-2 position (Li-Beisson et al., 2010). In  
477 plants, the *de novo* synthesis of fatty acids however is restricted to the chloroplast and thus fatty  
478 acids must leave the organelle for modification at the ER. Moreover, the resulting ER-derived  
479 glycerolipids must enter the chloroplast. FAX1 catalyses fatty acid export from the chloroplast  
480 and consequently, mutant lines lacking this transporter exhibit decreased levels of ER-derived  
481 and increased levels of plastid-derived lipids (Li et al., 2015a). By contrast, the  
482 trigalactosyldiacylglycerol (TGD) protein complex mediates ER-to-chloroplast lipid transport  
483 (Roston et al., 2012). Moreover, missing or reduced presence of the substrate recognition  
484 domain TGD2 or the nucleotide binding domain TGD3 were shown to hamper translocation  
485 across the TGD complex (Lu and Benning, 2009; Lu et al., 2007). Thus, the cold-induced  
486 decrease of FAX1 might retain fatty acids in the chloroplast and by this stimulate the prokaryotic  
487 pathway whereas the cold-induced decrease of TGD2 and TGD3 decreases the uptake of lipids  
488 derived from the eukaryotic pathway (Table 1). In fact, cold temperatures were shown to be  
489 accompanied by increased carbon fluxes via the prokaryotic pathway and reduced contribution  
490 of the eukaryotic pathway (Li et al., 2015b). Therefore, we consider the lowering of the FAX1,  
491 TGD2 and TGD3 protein levels as a novel factor involved in cold-induced modulation of the  
492 glycerolipid composition of chloroplast membranes (Table 1).

493

#### 494 **Cold acclimation is accompanied by changes in vesicle transfer at the chloroplast**

495 Rab-GTPases fulfil different functions in vesicle transport and may be involved in vesicle  
496 budding, motility, tethering and docking. Interestingly, the abundance of the putative Rab-B-class  
497 GTPase RAB-B1b was shown to increase after cold treatment (Table 1). This protein is based  
498 on n-terminal YFP-(yellow fluorescent protein)-fusions predicted to localize to the secretory  
499 pathway (Chow et al 2008; Camacho et al. 2009) but was also found in the envelope membrane  
500 (Ferro et al., 2010; Bruley et al., 2012; Bouchnak et al. 2019) (Table 1). The cold-induced  
501 increase of RAB-B1b in the chloroplast fraction might thus be indicative for an enhanced fusion  
502 of ER-derived vesicles with the outer envelope. The corresponding vesicles might deliver new  
503 lipids or other cargos required for cold-induced changes of the chloroplast envelope. However, it  
504 is also imaginable that RAB-B1b is part of the intraplastidic vesicle trafficking system, which  
505 contributes to the modulation of the thylakoid membrane. Interestingly, cold treatment results in  
506 an increase in the lipid to protein ratio (Chapman et al., 1983) and is accompanied by an

507 accumulation of vesicles in the stroma (Morré et al., 1991; Westphal et al., 2001). Moreover,  
508 already two RAB-GTPases (CPRabA5E, *At1g05810* and CPSAR1, *At5g18570*), have been  
509 identified to be involved in vesicle transport from the inner envelope to the thylakoid (Bang et al.,  
510 2009; Chigri et al., 2009; Garcia et al., 2010) and thus one might envision that RAB-B1b  
511 contributes to the cold-induced modulation of the thylakoid lipid content.

512

### 513 **Cold induced changes in the envelope point to alterations in nucleotide synthesis**

514 In plants, the first steps of pyrimidine nucleotide *de novo* synthesis take place in the plastid  
515 stroma (Witz et al., 2012). The enzyme aspartate transcarbamylase (ACTase) (Hemsley et al.,  
516 2013) catalyses the second step in this biosynthesis pathway (Chen and Slocum, 2008).  
517 Interestingly, its lipid anchor and our proteome analysis suggest that the ACTase is attached to  
518 the inner envelope membrane, at least temporarily. The considerable decrease of the ACTase  
519 (*At3g20330*) abundance (Table 1) in the cold might limit *de novo* synthesis of pyrimidine  
520 nucleotides. Moreover, the transporter (BT1; *At4g32400*), that delivers newly synthesised  
521 adenine nucleotides to the cytosol, shows decreased abundance in cold treated plants (Table 1).  
522 These observations imply that under cold conditions, the *de novo* synthesis of pyrimidine and  
523 purine nucleotides is of minor importance and that the corresponding salvage pathways might be  
524 enough to satisfy the cellular nucleotide demand. The lesser energy costs of these cytosolic  
525 salvage pathways (Witz et al. 2012) might represent an advantage particularly under cold  
526 conditions.

527

### 528 **Tocopherol synthesis is apparently altered in cold acclimated plants**

529 The exposure of plants to low temperatures initially results in the overreduction of the electron  
530 transport chain and increased generation of ROS (Erling Tjus et al., 1998). To prevent the ROS-  
531 induced damage of fatty acids, plants synthesize specific antioxidants, the tocopherols (vitamin  
532 E) (Maeda et al., 2006; Munné-Bosch, 2002). At first glance the moderate decrease of two  
533 envelope enzymes of the vitamin E synthesis pathway, VTE6 and VTE3 (Table 1), appears to be  
534 contradictory to the importance of tocopherols in cold acclimation. However, in this context it is  
535 important to note that defects in tocopherol synthesis may cause changes in the composition of  
536 the individual vitamin E vitamers in Arabidopsis (Mène-Saffrané, 2017). Therefore, the moderate  
537 decrease in the abundance of VTE3 and VTE6 might represent a putative fine-tuning

538 mechanism, shifting tocopherol biosynthesis towards the production of tocotrienols or PC-8,  
539 vitamers with even higher anti-oxidative function than  $\alpha$ -tocopherol (Serbinova et al., 1991;  
540 Olejnik et al., 1997).

541

## 542 **Impact of cold acclimation on chlorophyll turnover**

543 Various observations suggest that chlorophyll biosynthesis is strongly inhibited by cold  
544 temperatures (Tewari and Tripathy, 1998; Tewari and Tripathy, 1999). Interestingly, we identified  
545 that two envelope proteins involved in chlorophyll biosynthesis (Table 1) are of decreased  
546 abundance in the cold. The first one is the protoporphyrinogen IX oxidase 2 (PPO2 *At5g14220*),  
547 which catalyses the oxidation of protoporphyrinogen to protoporphyrin IX (Terry and Smith,  
548 2013). The second one is a chaperone-like protein (CPP1 *At5g23040*) required for stabilization  
549 of the light-dependent protochlorophyllide oxidoreductase POR (Lee et al., 2013). Therefore, the  
550 cold-induced inhibition of chlorophyll biosynthesis becomes visible also on the level of the  
551 chloroplast envelope proteome. However, photosynthetic activity, an important prerequisite for  
552 cold acclimation, relies on the availability of chlorophyll. In this context, it is important to mention  
553 that TIC55, a part of the translocon of the inner membrane, shows decreased abundance in the  
554 cold (Table 1). Absence of TIC55 was recently shown to prevent chlorophyll degradation after  
555 induction of senescence (Chou et al., 2018). Therefore, the decreased abundance of TIC55  
556 might help to keep a certain chlorophyll level during cold-induced inhibition of chlorophyll  
557 synthesis.

558

## 559 **Cold acclimation induces a differential localization of envelope associated soluble** 560 **proteins**

561 A fundamental principle to regulate enzyme activities is to increase or decrease their cellular  
562 amounts. Beyond that, higher order regulations are post-translational modifications like e.g.  
563 protein phosphorylation, acetylation, n-linked glycosylation etc. However, when protein activities  
564 at or in a membrane must be modified a regulative dissociation or association of soluble proteins  
565 to/from the respective membrane might be imaginable.

566 Comparing the abundance of soluble proteins enriched with the purified envelopes membranes  
567 allowed us to identify proteins that are higher apparent or lesser apparent at the envelope  
568 membrane after 4 days of cold acclimation. Therefore, a negative value indicates a putative

569 dissociation and a positive value an association from/to the envelope membrane (Figure 5,  
570 Table 2). We named this analysis differential localization (diffloc) and should not be mixed with a  
571 dual targeting (e.g. proteins targeted to mitochondria and chloroplast). Of course, such analyses  
572 only make sense for non-membrane intrinsic proteins (no TM domains or other membrane  
573 spanning domains like  $\beta$ -barrels, e.g. of OEPs). Additionally, putative candidates should not  
574 exhibit significant changes in total protein abundance at the level of total chloroplasts as this can  
575 result in negative or positive values not displaying a diffloc. This must be considered as diffloc  
576 values are calculated based on protein abundances.

577 We were able to exclude such candidates as the total abundance changes were determined  
578 based on the chloroplast samples. The vigorous treatment of the isolated envelope membranes  
579 with sodium carbonate diminishes the identification of weakly or better to say unspecific protein  
580 attachment to the envelope. Though, identification of envelope associated proteins without a  
581 biological relevance cannot completely be ruled out. Currently, it is only possible to speculate  
582 about the processes governing associating or dissociating of proteins and about their  
583 physiological relevance. However, it's worth to mention that among the identified diffloc proteins  
584 there are several candidates exhibiting regulatory functions. For example, the three Clp proteins  
585 are members of the CLP protease system, a component of the chloroplast protease network  
586 (Olinares et al., 2011) essential for chloroplast development. Furthermore, the spectrum of  
587 processes in which the identified diffloc proteins are involved includes fatty acid metabolism  
588 (FAP1 and BADC1), lipid metabolism (GDSL esterase/lipase), carotenoid (LCY-B) and heme  
589 synthesis (HEME2), protein modification (CAAX amino terminal protease), protein translation  
590 (S1-type protein small ribosomal subunit) and several other.

591 In Figure 5 A cluster of proteins exhibiting high diffloc values is indicated which in addition exhibit  
592 high log2FC abundance decreases (compare Table 1). Despite this decrease in protein  
593 abundance latter proteins exhibit a positive diffloc value. This indicates that the association to  
594 the envelope membrane in the cold is a result of a marked biochemical equilibrium towards  
595 membrane binding. E.g., we assume that the identified association of the aspartate  
596 carbamoyltransferase (ATCase) reflects its prevalent localization at the chloroplast envelope.

597

## 598 **Conclusion**

599 Our analyses revealed that the protein composition and content of the envelope membrane is  
600 apparently modified during cold acclimation. The abundance of most envelope membrane

601 proteins was reduced and only three proteins increased in response to cold treatment. We  
602 selected two transport proteins and made use of corresponding mutant plants to analyse  
603 whether the observed abundance changes are relevant for cold acclimation. In fact, absence of  
604 the protein that usually increases during cold as well as a constantly high level of the protein that  
605 usually vanishes in the cold led to higher susceptibility of the plants to freezing. Furthermore, the  
606 identification of several proteins with known or postulated functions in fatty acid synthesis, lipid  
607 metabolism, and lipid protection is in line with the relevance of these membrane compounds in  
608 cold acclimation. The identified proteins are promising candidates for detailed future analyses  
609 unravelling their individual roles in cold acclimation and freezing tolerance. Our differential  
610 localisation analysis might display a new approach for the identification of transitional protein  
611 associations to the envelope.

612

## 613 **Materials and Methods**

### 614 **Plant cultivation and cold acclimation conditions**

615 *Arabidopsis thaliana* L. (ecotype Columbia, Col-0) were sown on standard soil (type ED73,  
616 Hermann Meyer KG-Germany, <https://www.meyer-shop.com/>) and stratified at 4°C for 24h in  
617 darkness. Afterwards, the plants were transferred to a plant cultivation chamber (Fitotron model  
618 SGR223, Weis Technik, Reiskirchen Germany). Cultivation condition: 22°C day temperature,  
619 18°C night temperature, day length 10h, relative humidity 60% and 120 $\mu$ E light intensity. For  
620 cold acclimation, plants were incubated for 4 days at 4°C while all other cultivation parameters  
621 were kept constant. Non-acclimated plants were further cultivated under standard conditions as  
622 described above. Plant leaf material used for organelle purification was collected one hour  
623 before onset of light.

624

### 625 **Isolation of chloroplast envelope membranes**

626 The envelope membrane isolation procedure can be divided into two steps: a) isolation of intact  
627 chloroplasts and b) enrichment of envelope membranes from these chloroplasts using a sucrose  
628 step gradient (Supp. Fig. S1). The isolation of intact chloroplasts was carried out with some  
629 modifications according an existing protocol (Kunst, 1998). 200 g leaf material were chopped off  
630 from 34 days old *Arabidopsis* plants (cold acclimated and control plants kept at 22°C) and  
631 transferred to ice-cold homogenization buffer medium (0.45 M sorbitol, 20 mM Tricine-KOH pH  
632 8.4, 10 mM EDTA, 10 mM NaHCO<sub>3</sub>, 0.1% fatty-acid free bovine serum albumin). Ratio of buffer  
633 volume to weight of leaf material was 3:1 (v/w). In a glass-beaker the buffer/leaf mixture was  
634 further cooled in ice water to limit metabolic activity to a minimum. After 30 min the mixture was  
635 transferred to a 1 L stainless steel beaker. For a controlled rupture of the leaves, the blender  
636 was successively set on for 1s at setting “low”, 1 sec at “medium” and 1 sec at “high” (Waring  
637 blender commercial heavy-duty blender). This procedure was repeated twice. The disrupted leaf  
638 material was than filtered through 3 layers of Miracloth (<http://www.merckmillipore.com>), placed  
639 in a funnel and the flow through was collected in an ice cooled Erlenmeyer flask. From this  
640 suspension the chloroplast fraction was collected by centrifugation (1.000 g, 10 min, 4°C) and  
641 gently resuspended in 8 ml resuspension buffer medium (0.3M sorbitol, 20 mm Tricine-KOH,  
642 pH7.6, 5mM MgCl<sub>2</sub>, 2.5 mM EDTA), using a natural bristle paint brush.

643 A Percoll™ gradient was prepared by mixing equal volumes of 2-times concentrated  
644 resuspension buffer medium and pure Percoll™. 30 ml of this mixture were transferred to 36 ml  
645 centrifuge tubes centrifuged (Sorval SS34 fixed angle rotor, 43.400 g, 30 min, 4°C, no brake).  
646 Two Percoll™ gradients were enough for 200 g of leaf material. The Percoll gradient was  
647 overlaid with the resuspended chloroplast suspension. After centrifugation in a HB4 swing out  
648 rotor (13.300 g, 15 min, 4°C, no brake) two distinct green bands appeared (Supp. Fig.S1). The  
649 upper band, containing broken chloroplasts, was removed by using a water jet pump and the  
650 lower band was collected using a wide opened Pasteur pipette. This fraction was transferred to a  
651 SS34 tube and diluted with 3 volumes of resuspension buffer medium. From that suspension,  
652 intact chloroplasts were collected by centrifugation (HB4 rotor, 2.700 g, 5 min, no brake).

653 Enrichment of envelope membranes was carried with modifications according to a given protocol  
654 (Ferro et al., 2003). The intact chloroplast fraction was vigorously resuspended in 2 ml of buffer  
655 medium (10 mM MOPS-NaOH, pH 7.8) and kept on ice for 10 min to allow osmotic disruption of  
656 chloroplasts. To prevent protease driven protein degradation the buffer medium was  
657 complemented with a protease inhibitor cocktail (cOmplete™, EDTA-free,  
658 [www.sigmaaldrich.com](http://www.sigmaaldrich.com)Sigma). At this step 100 µl samples were collected from the lysate for the  
659 mass spectrometry-based identification of total chloroplast proteins.

660 A three-step sucrose gradient (bottom to top: 4 ml 0.93M, 0.6M and 0.3M sucrose) prepared in  
661 Ultra-Clear™ tubes (16x102 mm, [www.beckmann.de](http://www.beckmann.de)) was overlaid with 1 ml of disrupted  
662 chloroplast preparation. After ultra-centrifugation (swing-out rotor SureSpin™ 630, [www.thermo-](http://www.thermo-fisher.com)  
663 [fisher.com](http://www.thermo-fisher.com), 70.000 g, 1h, 4°C, no brake) the yellowish envelope fraction was collected from the  
664 inter-phase between 0.93M and 0.6M sucrose (Supp. Fig. S1). This fraction was 2-times diluted  
665 with double distilled water ( $\text{d}_2\text{H}_2\text{O}$ ) and the envelope membranes were collected by ultra-  
666 centrifugation (ST120AT rotor, [www.thermofisher.com](http://www.thermofisher.com), 400.000 g, 20 min, 4°C). The resulting  
667 membrane fraction was resuspended in 1ml  $\text{d}_2\text{H}_2\text{O}$  to remove any remaining sucrose. To remove  
668 membrane-associated proteins the envelope membranes were resuspended in 1M of sodium  
669 carbonate ( $\text{Na}_2\text{CO}_3$ ) medium and centrifuged again, as described above. This washing step was  
670 repeated 5 times.

671

## 672 **Protein identification by tryptic digestion and mass spectrometry**

673 Subsequently to protein estimation by Bradford assay (Bradford, 1976), the  $\text{d}_2\text{H}_2\text{O}$  resuspended  
674 envelope membranes or the total chloroplast samples membranes were solubilised by addition



675 of SDS to a final volume of 2%, and 6-times concentrated SDS-Page loading dye was added  
676 (375mM Tris-HCl, pH6.8, 0.3% SDS (w/v), 60% glycerol (w/v), 1.5% bromphenolblue (w/v).

677 Equal amounts of envelope protein and chloroplast samples (isolated from cold acclimated or  
678 and control plants) were loaded on 12% SDS-Page. After Coomassie staining of the SDS-Page,  
679 the lanes were cut into 8 equal pieces and each piece was additionally cut into small cubes of  
680 approximately 1 mm side length. By consecutively (3-times) shrinking (with pure acetonitrile) and  
681 swelling (in 20 mM  $\text{NH}_4\text{HCO}_3$ ) the buffer in which the gel pieces were resuspended, was  
682 removed before the proteins were reduced using 10mM DTT and alkylated using 55mM 2-  
683 iodoacetamide. Proteins were digested by addition of 12.5 ng/ $\mu\text{l}$  trypsin (Sigma-Pierce™,  
684 Trypsin Protease MS-Grade, [www.thermoscientific.com](http://www.thermoscientific.com)) and incubation at 37°C for 15 h. Finally,  
685 peptides were extracted from the gel matrix using 2% trifluoroacetic acid. To guarantee a  
686 complete extraction of peptides the gel pieces were subsequent to a short centrifugation and  
687 removal of the supernatant shrunk again using acetonitrile. After short centrifugation the  
688 supernatants were collected, and the gel pieces were again treated with 2% trifluoroacetic acid.  
689 All three supernatants were pooled and dried down by vacuum centrifugation to approximately  
690 30  $\mu\text{l}$ . The peptide samples were desalted using handmade C18 STAGE tips following the  
691 protocol described by (Rappsilber et al., 2007). Finally, the C18 STAGE tip eluates were  
692 concentrated to approximately 2  $\mu\text{l}$  and filled up to 20  $\mu\text{l}$  with HPLC buffer A (2% acetonitrile,  
693 0.1% formic acid).

694

## 695 **Protein identification and quantification**

696 MS analysis was performed on a high-resolution LC-MS system (Eksigent nanoLC425 coupled  
697 to a Triple-TOF 6600, AB Sciex) in information dependent acquisition (IDA) mode. HPLC  
698 separation of 7.5  $\mu\text{l}$  sample was performed in trap-elution mode using TriartC18 columns (5  $\mu\text{m}$   
699 particle, 0.5 × 5 mm for trapping and 3  $\mu\text{m}$  particle, 300  $\mu\text{m}$  × 150 mm for separation, YMC). A  
700 constant flow of 4  $\mu\text{l min}^{-1}$  was employed and the gradient ramped within 15 min from 3 to 35%  
701 of HPLC buffer B (buffer A: 2% acetonitrile, 0.1% formic acid; buffer B: 90% acetonitrile, 0.1%  
702 formic acid), then within 1 min to 80% HPLC buffer B, followed by washing and equilibration  
703 steps. The mass spectrometer recorded one survey scan (250 ms accumulation time, 350–1250  
704 m/z) and fragment spectra (100–1500 m/z) of the 30 most intense parent ions (30 ms  
705 accumulation time, charge state > 2, intensity > 300 cps, exclusion for 6 sec after one  
706 occurrence) resulting in a total cycle time of 1.2 sec. Identification and quantification of the

707 proteins were performed using MaxQuant v. 1.6.0.16 (Cox and Mann, 2008). Spectra were  
708 matched against the ensemble plants release 43 of the Arabidopsis thaliana Tair10 genome  
709 release. The peptide database was constructed considering methionine oxidation and  
710 acetylation of protein N-termini as variable modifications and carbamido-methylation of cysteines  
711 as a fixed modification. False discovery rate (FDR) thresholds for peptide spectrum matches and  
712 protein identification were set to 1%. Protein quantification was carried out using the match-  
713 between-runs feature and the MaxQuant Label free Quantification (LFQ) algorithm (Cox et al.,  
714 2014). To make the complete mass spectrometric proteomic data available to the scientific  
715 community they have been deposited in the ProteomeXchange Consortium via the PRIDE  
716 partner repository (Perez-Riverol et al. 2018) with the dataset identifier PXD015794.

717

## 718 **Identification of cold regulated envelope proteins**

719 In order to determine if a protein is localized to the chloroplast envelope and cold regulated, we  
720 decided to perform a multivariable logistic regression to integrate literature knowledge as well as  
721 data measured in this study. A positive and negative training data set was constructed using a  
722 combination of AT\_CHLORO (Ferro et al., 2010; Bruley et al., 2012) and Plant Proteome  
723 Database (Kaplan et al., 2006; Sun et al., 2009) curated databases of sub-plastidial localization  
724 of proteins. As regressors we relied on a selected subset of protein sequence features defined in  
725 the AAindex1: Activation Gibbs energy of unfolding at pH 9.0, amino acid composition of MEM of  
726 single-spanning proteins, principal component II, hydrophobicity index, the Chou-Fasman  
727 parameter of coil conformation, average number of surrounding residues, interior composition of  
728 amino acids in intracellular proteins of mesophiles, weights for coil at the window position of -3,  
729 helix formation parameters, free energy in alpha-helical regions, average relative fractional  
730 occurrence in EL(i), and composition of amino acids in extracellular proteins (Zimmer et al.,  
731 2018). This set was extended using the experimental enrichment factors, calculated as the log<sub>2</sub>  
732 fold change between the LFQ (abundances) of the plastid and envelope fractions. Subsequently,  
733 each score of the trained model was assigned to a posterior error probability (Käll et al., 2008).  
734 In the succeeding step to detect plastidic proteins with a differential abundance at low  
735 temperature treatment, we used the SAM method for statistical significance analysis (Larsson et  
736 al., 2005). Testing was performed using 4 biological replicates per condition. As response  
737 variables, the log<sub>2</sub> transformed LFQ values of the plastidic fractions were used. A protein was  
738 treated as differentially regulated and envelope localized, if a q-value threshold of maximum 5%  
739 was not exceeded. Analyses was performed using Microsoft F# functional programming

740 language with the bioinformatics library FSharpBio (available on GitHub:  
741 <https://github.com/CSBiology/BioFSharp>) in combination with the open source and cross-  
742 platform machine learning framework ML.NET. Charts were generated using the graphical chart  
743 library FSharp.Plotly (available on GitHub: <https://github.com/muehlhaus/FSharp.Plotly>). To  
744 assess the significance of differentially localizes proteins we compared the enrichment factors  
745 under cold and normal condition in the log<sub>2</sub> space using Student's T test statistic in SAM to  
746 account for multiple testing.

747

#### 748 **Generation of AtMEX1 overexpression mutants**

749 For cloning of *Atmex1*, gene sequences were amplified within a PCR reaction using the phusion-  
750 polymerase. For amplification a forward-primer containing a four base pair sequence (CACC) at  
751 its 5' end and a reverse-primer were used (*Atmex1*+1f\_cacc:  
752 CACCATGGAAGGTAAAGCCATCGCG, AtMEX1c+1245r-stop:  
753 CGGTCCAAAAACAAGTTCTTTC). Cloning in the pENTR/D-Topo vector was done following the  
754 instruction of the pENTR™ Directional TOPO® Cloning Kit ([www.thermofisher.com/invitrogen](http://www.thermofisher.com/invitrogen)).  
755 Entry vectors were then used to perform a recombination reaction with the expression-vector  
756 pUB-C-GFP (Grefen et al., 2010). The recombination reaction was done with the help of the  
757 Gateway™ LR Clonase™ II Enzyme Mix ([www.thermofisher.com/invitrogen](http://www.thermofisher.com/invitrogen)) according to the  
758 guidelines of the manufacturer. *Atmex1* expression vectors were then used for heat-shock  
759 transformation of competent *Agrobacterium tumefaciens* cells (Höfgen and Willmitzer, 1988).  
760 Arabidopsis *mex1-1* mutant plants were then transformed according to a simplified version of the  
761 “floral dip method” suggested by Clough and Bent (Clough and Bent, 1998). Therefore,  
762 transformed *Agrobacterium* strains were grown in 200ml YEB liquid culture to an OD<sub>600</sub> of  
763 approximately 0.8. Cells were harvested by centrifugation for 10 minutes with 4500 g at 4°C. 5%  
764 of sucrose (w/v) and 0.05% Silwet L77 (v/v) solved in water, were added to the *Agrobacterium*  
765 pellet. This mixture was then transferred in beakers. Five to six-week-old *Atmex1-1* plants,  
766 showing first closed inflorescences, were dipped in the bacteria culture for about 30 seconds.  
767 The dipped plants were transferred to plastic trays and were covered by a plastic hood for the  
768 following 48 hours. After 48 hours the plants were returned to their normal growing conditions  
769 and seeds were harvested three to four weeks after dipping. Seeds of Arabidopsis plants  
770 obtained from *Agrobacterium tumefaciens* mediated transformation were germinated on soil and  
771 selected by spraying with 0.1% BASTA (Glufosinat-Ammoniumsolt) herbicide (Logemann et al.,

772 2006). Spraying was carried out on plants one week after germination and was repeated four  
773 times in intervals of two days.

#### 774 **Freezing tolerance test**

775 To perform a freezing tolerance test seeds of Arabidopsis WT and mutant plants were sowed  
776 and stratified as described above. After one-week seedlings were pricked into small pots  
777 containing standard soil (see above) and further cultivated in a Percival plant growth cabinet  
778 (Typ AR-36L/LT [www.plantclimatics.de](http://www.plantclimatics.de)) under the described conditions. After further cultivation  
779 for 10 days the day and night temperature were lowered to 4°C for four days (cold acclimation).  
780 At the end of the night period of the fourth day the illumination was set of and the temperature  
781 was lowered from 4°C to -10°C in a stepwise manner (2°C per hour). The freezing temperature  
782 was kept constant for 15 hours before the temperature was increased to 22°C in a step wise  
783 manner (2°C per hour). Afterwards normal growing conditions were restored (see above). Plants  
784 were daily inspected and wilting of leaves was documented by photographs.

785

786 **Literature cited**

- 787
- 788 Ajjawi I, Coku A, Froehlich JE, Yang Y, Osteryoung KW, Benning C, Last RL (2011) A J-like  
789 protein influences fatty acid composition of chloroplast lipids in Arabidopsis. PLoS ONE 6 (10):  
790 e25368. doi: 10.1371/journal.pone.0025368
- 791 Alberdi M, Corcuera LJ (1991) Cold acclimation in plants. Phytochemistry (United Kingdom)
- 792 Amme S, Matros A, Schlesier B, Mock HP (2006) Proteome analysis of cold stress response in  
793 Arabidopsis thaliana using DIGE-technology. J Exp Bot 57: 1537–1546.
- 794 Awai K, Xu C, Tamot B, Benning C (2006) A phosphatidic acid-binding protein of the chloroplast  
795 inner envelope membrane involved in lipid trafficking. Proc Natl Acad Sci USA 103: 10817–  
796 10822
- 797 Bang WY, Hata A, Jeong IS, Umeda T, Masuda T, Chen J, Yoko I, Suwastika IN, Kim DW, Im  
798 CH, Lee BH, Lee Y, Lee KW, Shiina T, Bahk JD (2009) AtObgC, a plant ortholog of bacterial  
799 Obg, is a chloroplast-targeting GTPase essential for early embryogenesis. Plant Mol Biol 71:  
800 379-390
- 801 Barrero-Sicilia C, Silvestre S, Haslam RP, Michaelson LV (2017) Lipid remodelling: Unravelling  
802 the response to cold stress in Arabidopsis and its extremophile relative *Eutrema salsugineum*.  
803 Plant Sci 263: 194–200
- 804 Bouchnak I, Brugière S, Moyet L, Le Gall S, Salvi D, Kuntz, Marcel K, Tardif M, Rolland N (2019)  
805 Unraveling Hidden Components of the Chloroplast Envelope Proteome: Opportunities and Limits  
806 of Better MS Sensitivity. MCP 18: 1285–1306.
- 807 Bradford MM (1976) A rapid and sensitive method for the quantitation of microgram quantities of  
808 protein utilizing the principle of protein-dye binding. Anal Biochem 72: 248–254
- 809 Bruley C, Dupierris V, Salvi D, Rolland N, Ferro M (2012) AT\_CHLORO: A chloroplast protein  
810 database dedicated to sub-plastidial localization. Front Plant Sci 3: 205. doi:  
811 10.3389/fpls.2012.00205
- 812 BB Buchanan (2015) Biochemistry & molecular biology of plants, Ed. 2. Wiley Blackwell;  
813 American Society of Plant Biologists, Chichester, Rockville, Md, USA
- 814 Calixto CPG, Guo W, James AB, Tzioutziou NA, Entizne JC, Panter PE, Knight H, Nimmo HG,  
815 Zhang R, Brown JWS (2018) Rapid and dynamic alternative splicing impacts the Arabidopsis  
816 cold response transcriptome. Plant Cell 30: 1424–1444
- 817 Camacho L, Smertenko AP, Pérez-Gómez J, Hussey PJ, Moore I (2009) Arabidopsis Rab-E  
818 GTPases exhibit a novel interaction with a plasma-membrane phosphatidylinositol-4-phosphate  
819 5-kinase. J Cell Sci 122: 4383–4392

- 820 Catalá R, Medina J, Salinas J (2011) Integration of low temperature and light signalling during  
821 cold acclimation response in Arabidopsis. *Proc Natl Acad Sci USA* 108: 16475–16480
- 822 Chapman DJ, De-Felice J, Barber J (1983) Growth temperature effects on thylakoid membrane  
823 lipid and protein content of pea chloroplasts. *Plant Physiol* 72: 225–228
- 824 Chen CT, Slocum RD (2008) Expression and functional analysis of aspartate transcarbamoylase  
825 and role of de novo pyrimidine synthesis in regulation of growth and development in Arabidopsis.  
826 *Plant Physiol Biochem* 46: 150–159
- 827 Chen J, Han G, Shang C, Li J, Zhang H, Liu F, Wang J, Liu H, Zhang Y (2015): Proteomic  
828 analyses reveal differences in cold acclimation mechanisms in freezing-tolerant and freezing-  
829 sensitive cultivars of alfalfa. *Front Plant Sci* 6. doi: 10.3389/fpls.2015.00105.
- 830 Cheng Z, Sattler S, Maeda H, Sakuragi Y, Bryant DA, DellaPenna D (2003) Highly divergent  
831 methyltransferases catalyze a conserved reaction in tocopherol and plastoquinone synthesis in  
832 cyanobacteria and photosynthetic eukaryotes. *Plant Cell* 15: 2343–2356
- 833 Chigri F, Sippel C, Kolb M, Vothknecht UC (2009) Arabidopsis OBG-like GTPase (AtOBGL) is  
834 localized in chloroplasts and has an essential function in embryo development. *Mol Plant* 2:  
835 1373–1383
- 836 Chou ML, Liao WY, Wei WC, Li AYS, Chu CY, Wu CL, Liu CL, Fu TH, Lin LF (2018) The direct  
837 involvement of dark-induced Tic55 protein in chlorophyll catabolism and its indirect role in the  
838 MYB108-NAC signalling pathway during leaf senescence in Arabidopsis thaliana. *Int J Mol Sci*  
839 19: 1854; doi:10.3390/ijms19071854
- 840 Chow CM, Neto H, Foucart C Moore I (2008) Rab-A2 and Rab-A3 GTPases define a trans-golgi  
841 endosomal membrane domain in Arabidopsis that contributes substantially to the cell plate.  
842 *Plant Cell* 20: 101–123.
- 843 Clough SJ, Bent AF (1998) Floral dip: a simplified method for Agrobacterium-mediated  
844 transformation of Arabidopsis thaliana. *Plant J* 16: 735–743
- 845 Cox J, Hein MY, Lubner CA, Paron I, Nagaraj N, Mann M (2014) Accurate proteome-wide label-  
846 free quantification by delayed normalization and maximal peptide ratio extraction, termed  
847 MaxLFQ. *Mol Cell Proteom* 13: 2513–2526
- 848 Cox J, Mann M (2008) MaxQuant enables high peptide identification rates, individualized p.p.b.-  
849 range mass accuracies and proteome-wide protein quantification. *Nature Biotechnol* 26: 1367–  
850 1372
- 851 Crosatti C, Rizza F, Badeck FW, Mazzucotelli E, Cattivelli L (2013) Harden the chloroplast to  
852 protect the plant. *Physiol Plant* 147: 55–63
- 853 Erling Tjus S, Lindberg Møller B, Vibe Scheller H (1998) Photosystem I is an early target of  
854 photoinhibition in barley illuminated at chilling temperatures. *Plant Physiol* 116: 755–764.



- 855 Ferro M, Brugière S, Salvi D, Seigneurin-Berny D, Court M, Moyet L, Ramus C, Miras S, Mellal  
856 M, Le Gall S, Kieffer-Jaquinod S, Bruley C, Garin J, Joyard J, Masselon C, Rolland N (2010)  
857 AT\_CHLORO, a comprehensive chloroplast proteome database with subplastidial localization  
858 and curated information on envelope proteins. *Mol Cell Proteom* 9: 1063–1084
- 859 Ferro M, Salvi D, Brugière S, Miras S, Kowalski S, Louwagie M, Garin J, Joyard J, Rolland N  
860 (2003) Proteomics of the chloroplast envelope membranes from *Arabidopsis thaliana*. *Mol Cell*  
861 *Proteom* 2: 325–345
- 862 Fritsche S, Wang X, Jung C (2017) Recent advances in our understanding of tocopherol  
863 biosynthesis in plants: An overview of key genes, functions, and breeding of Vitamin E improved  
864 crops. *Antioxidants (Basel)* 6: E99. doi: 10.3390/antiox6040099
- 865 Gao F, Zhou Y, Zhu W, Li X, Fan L, Zhang G (2009): Proteomic analysis of cold stress-  
866 responsive proteins in *Thellungiella rosette* leaves. *Planta* 230: 1033–1046
- 867 Garcia C, Khan NZ, Nannmark U, Aronsson H (2010) The chloroplast protein CPSAR1, dually  
868 localized in the stroma and the inner envelope membrane, is involved in thylakoid biogenesis.  
869 *Plant J* 63: 73–85
- 870 Goetze TA, Patil M, Jeshen I, Bölter B, Grahl S, Soll J (2015) Oep23 forms an ion channel in the  
871 chloroplast outer envelope. *BMC Plant Biol* 15: 47. doi: 10.1186/s12870-015-0445-1
- 872 Goulas E, Schubert M, Kieselbach T, Kleczkowski LA, Gardeström P, Schröder W, Hurry V  
873 (2006): The chloroplast lumen and stromal proteomes of *Arabidopsis thaliana* show differential  
874 sensitivity to short- and long-term exposure to low temperature. *Plant J* 47: 720–734.
- 875 Grefen C, Donald N, Hashimoto K, Kudla J, Schumacher K, Blatt MR (2010) A ubiquitin-10  
876 promoter-based vector set for fluorescent protein tagging facilitates temporal stability and native  
877 protein distribution in transient and stable expression studies. *Plant J* 64: 355–365
- 878 Haferkamp I, Schmitz-Esser S (2012) The plant mitochondrial carrier family: functional and  
879 evolutionary aspects. *Front Plant Sci* 3: 2 doi: 10.3389/fpls.2012.00002
- 880 Hemsley PA, Weimar T, Lilley KS, Dupree P, Grierson CS (2013) A proteomic approach  
881 identifies many novel palmitoylated proteins in *Arabidopsis*. *New Phytol* 197: 805–814
- 882 Hinch DK (2008) Effects of alpha-tocopherol (vitamin E) on the stability and lipid dynamics of  
883 model membranes mimicking the lipid composition of plant chloroplast membranes. *FEBS Lett*  
884 582: 3687–3692
- 885 Höfgen R, Willmitzer L (1988) Storage of competent cells for *Agrobacterium* transformation.  
886 *Nucleic Acids Res* 16: 9877
- 887 Käll L, Storey JD, MacCoss MJ, Noble WS (2008) Posterior error probabilities and false  
888 discovery rates: two sides of the same coin. *J Proteome Res* 7: 40–44



- 889 Kampfenkel K, Möhlmann T, Batz O, van Montagu M, Inzé D, Neuhaus HE (1995) Molecular  
890 characterization of an *Arabidopsis thaliana* cDNA encoding a novel putative adenylate  
891 translocator of higher plants. *FEBS Lett* 374: 351–355
- 892 Kaplan F, Guy CL (2004)  $\beta$ -Amylase induction and the protective role of maltose during  
893 temperature shock. *Plant Physiol* 135: 1674–1684
- 894 Kaplan F, Sung DY, Guy CL (2006) Roles of beta-amylase and starch breakdown during  
895 temperatures stress. *Physiol Planta* 126: 120–128
- 896 Karim S, Aronsson H (2014) The puzzle of chloroplast vesicle transport – involvement of  
897 GTPases. *Front Plant Sci* 5: 472 doi: 10.3389/fpls.2014.00472
- 898 Khanal N, Bray GE, Grisnich A, Moffatt BA, Gray GR (2017) Differential mechanisms of  
899 photosynthetic acclimation to light and low temperature in *Arabidopsis* and the extremophile  
900 *Eutrema salsugineum*. *Plants (Basel)* 6: (3). pii: E32. doi: 10.3390/plants6030032
- 901 Kim H, Botelho SC, Park K, Kim H (2015) Use of carbonate extraction in analyzing moderately  
902 hydrophobic transmembrane proteins in the mitochondrial inner membrane. *Protein Sci* 24:  
903 2063–2069
- 904 Kirchberger S, Tjaden J, Neuhaus HE (2008) Characterization of the *Arabidopsis* Brittle1  
905 transport protein and impact of reduced activity on plant metabolism. *Plant J* 56: 51–63
- 906 Kleine T, Leister D (2013) Retrograde signals galore. *Front Plant Sci* 4: 45 doi:  
907 10.3389/fpls.2013.00045
- 908 Knaupp M, Mishra KB, Nedbal L, Heyer AG (2011) Evidence for a role of raffinose in stabilizing  
909 photosystem II during freeze-thaw cycles. *Planta* 234: 477–486
- 910 Kosova K, Vıtamvas P, Planchon S, Renaut J, Vankova R, Prašil IT (2013) Proteome analysis of  
911 cold response in spring and winter wheat (*Triticum aestivum*) crowns reveals similarities in  
912 stress adaptation and differences in regulatory processes between the growth habits. *J*  
913 *Proteome Res* 12: 4830–4845.
- 914 Kotting O, Kossmann J, Zeeman SC, Lloyd JR (2010) Regulation of starch metabolism: the age  
915 of enlightenment? *Curr Opin Plant Biol* 13: 321–329
- 916 Kunst L (1998) Preparation of physiologically active chloroplasts from *Arabidopsis*. *Methods Mol*  
917 *Biol* 82: 43–48
- 918 Lai CP, Huang LM, Chen LFO, Chan MT, Shaw JF (2017) Genome-wide analysis of GDSL-type  
919 esterases/lipases in *Arabidopsis*. *Plant Mol Biol* 95: 181–197
- 920 Larsson O, Wahlestedt C, Timmons JA (2005) Considerations when using the significance  
921 analysis of microarrays (SAM) algorithm. *BMC Bioinform* 6: 129
- 922 Lee JY, Lee HS, Song JY, Jung YJ, Reinbothe S, Park YI, Lee SY, Pai HS (2013) Cell growth  
923 defect factor1/chaperone-like protein of POR1 plays a role in stabilization of light-dependent

- 924 protochlorophyllide oxidoreductase in *Nicotiana benthamiana* and *Arabidopsis*. *Plant Cell* 25:  
925 3944–3960
- 926 Li N, Gügel IL, Giavalisco P, Zeisler V, Schreiber L, Soll J, Philippar K (2015a) FAX1, a novel  
927 membrane protein mediating plastid fatty acid export. *PLoS Biol* 13: e1002053
- 928 Li Q, Zheng Q, Shen W, Cram D, Fowler DB, Wei Y, Zou J (2015b) Understanding the  
929 Biochemical Basis of Temperature-Induced Lipid Pathway Adjustments in Plants. *Plant Cell* 27:  
930 86–103
- 931 Li-Beisson Y, Shorrosh B, Beisson F, Andersson MX, Arondel V, Bates PD, Baud S, Bird D,  
932 Debono A, Durrett TP, Franke RB, Graham IA, Katayama K, Kelly AA, Larson T, Markham JE,  
933 Miquel M, Molina I, Nishida I, Rowland O, Samuels L, Schmid KM, Wada H, Welti R, Xu C, Zallot  
934 R, Ohlrogge J (2010) Acyl-lipid metabolism. *The Arabidopsis book* 8: e0133
- 935 Logemann E, Birkenbihl RP, Ülker B, Somssich IE (2006) An improved method for preparing  
936 *Agrobacterium* cells that simplifies the *Arabidopsis* transformation protocol. *Plant Methods* 2: 16  
937 doi: 10.1186/1746-4811-2-16
- 938 Lu B, Benning C (2009) A 25-Amino Acid Sequence of the *Arabidopsis* TGD2 Protein Is  
939 Sufficient for Specific Binding of Phosphatidic Acid. *J Biol Chem* 284: 17420–17427
- 940 Maeda H, Song W, Sage TL, DellaPenna D (2006) Tocopherols play a crucial role in low-  
941 temperature adaptation and Phloem loading in *Arabidopsis*. *Plant Cell* 18: 2710–2732
- 942 Maurer-Stroh S, Eisenhaber F (2005) Refinement and prediction of protein prenylation motifs.  
943 *Genome Biol* 6: R55
- 944 McFadden GI (1999) Endosymbiosis and evolution of the plant cell. *Curr Opin Plant Biol* 2: 513–  
945 519
- 946 Mène-Saffrané L (2017) Vitamin E biosynthesis and its regulation in plants. *Antioxidants (Basel)*  
947 7(1) pii: E2. doi: 10.3390/antiox7010002
- 948 Mock HP, Grimm B (1997) Reduction of uroporphyrinogen decarboxylase by antisense RNA  
949 expression affects activities of other enzymes involved in tetrapyrrole biosynthesis and leads to  
950 light-dependent necrosis. *Plant Physiol* 113: 1101–1112
- 951 Moellering ER, Muthan B, Benning C (2010) Freezing tolerance in plants requires lipid  
952 remodeling at the outer chloroplast membrane. *Science* 330: 226–228
- 953 Morré DJ, Selldén G, Sundqvist C, Sandelius AS (1991) Stromal low temperature compartment  
954 derived from the inner membrane of the chloroplast envelope. *Plant Physiol* 97: 1558–1564
- 955 Munné-Bosch S (2002) The function of tocopherols and tocotrienols in plants. *Crit Rev Plant Sci*  
956 21: 31–57

- 957 Nägele T, Heyer AG (2013) Approximating subcellular organisation of carbohydrate metabolism  
958 during cold acclimation in different natural accessions of *Arabidopsis thaliana*. *New Phytol* 198:  
959 777–787
- 960 Ngaki MN, Louie GV, Philippe RN, Manning G, Pojer F, Bowman ME, Li L, Larsen E, Wurtele  
961 ES, Noel JP (2012) Evolution of the chalcone-isomerase fold from fatty-acid binding to  
962 stereospecific catalysis. *Nature* 485: 530-533
- 963 Niittylä T, Messerli G, Trevisan M, Chen J, Smith AM, Zeeman SC (2004) A previously unknown  
964 maltose transporter essential for starch degradation in leaves. *Science* 303: 87–89
- 965 Olejnik D, Gogolewski M, Nogala-Kałużka M (1997) Isolation and some properties of  
966 plastochromanol-8. *Food* 41: 101–104
- 967 Olinares PDB, Kim J, van Wijk KJ (2011) The Clp protease system; a central component of the  
968 chloroplast protease network. *Biochim Biophys Acta* 1807: 999–1011
- 969 Patzke K, Prananingrum P, Klemens PAW, Trentmann O, Rodrigues CM, Keller I, Fernie AR,  
970 Geigenberger P, Bölter B, Lehmann M, Schmitz-Esser S, Pommerrenig B, Haferkamp I,  
971 Neuhaus HE (2019) The plastidic sugar transporter pSuT influences flowering and affects cold  
972 responses. *Plant Physiol* 179: 569–587
- 973 Perez-Riverol Y, Csordas A, Bai J, Bernal-Llinares M, Hewapathirana S, Kundu DJ, Inuganti A,  
974 Griss J, Mayer G, Eisenacher M, Pérez E, Uszkoreit J, Pfeuffer J, Sachsenberg T, Yilmaz S,  
975 Tiwary S, Cox J, Audain E, Walzer M, Jarnuczak AF, Ternent T, Brazma A, Vizcaíno JA (2019)  
976 The PRIDE database and related tools and resources in 2019: improving support for  
977 quantification data. *Nucleic Acids Res* 47(D1): D442-D450
- 978 Pfalz J, Liebers M, Hirth M, Grübler B, Holtzegel U, Schröter Y, Dietzel L, Pfannschmidt T (2012)  
979 Environmental control of plant nuclear gene expression by chloroplast redox signals. *Front Plant*  
980 *Sci* 3:257. doi: 10.3389/fpls.2012.00257
- 981 Pommerrenig B, Ludewig F, Cvetkovic J, Trentmann O, Klemens PAW, Neuhaus HE (2018) In  
982 concert: orchestrated changes in carbohydrate homeostasis are critical for plant abiotic stress  
983 tolerance. *Plant Cell Physiol* 59: 1290–1299
- 984 Purdy SJ, Bussell JD, Nunn CP, Smith SM (2013) Leaves of the *Arabidopsis* maltose exporter1  
985 mutant exhibit a metabolic profile with features of cold acclimation in the warm. *PLoS one* 8 (11):  
986 e79412. doi: 10.1371/journal.pone.0079412
- 987 Rappsilber J, Mann M, Ishihama Y (2007) Protocol for micro-purification, enrichment, pre-  
988 fractionation and storage of peptides for proteomics using StageTips. *Nature Prot* 2: 1896–1906
- 989 Reinhold T, Alawady A, Grimm B, Beran KC, Jahns P, Conrath U, Bauer J, Reiser J, Melzer M,  
990 Jeblick W, Neuhaus HE (2007) Limitation of nocturnal import of ATP into *Arabidopsis*  
991 chloroplasts leads to photooxidative damage. *Plant J* 50: 293–304
- 992 Reiser J, Linka N, Lemke L, Jeblick W, Neuhaus HE (2004) Molecular physiological analysis of  
993 the two plastidic ATP/ADP transporters from *Arabidopsis*. *Plant Physiol* 136: 3524–3536

- 994 Rekarte-Cowie I, Ebshish OS, Mohamed KS, Pearce RS (2008) Sucrose helps regulate cold  
995 acclimation of *Arabidopsis thaliana*. *J Exp Bot* 59: 4205–4217
- 996 Ren J, Wen L, Gao X, Jin C, Xue Y, Yao X (2008) CSS-Palm 2.0: an updated software for  
997 palmitoylation sites prediction. *Protein Eng Des Sel* 21: 639–644
- 998 Rocco M, Arena S, Renzone G, Scippa GS, Lomaglio T, Verrillo F, Scaloni A, Marra M (2013):  
999 Proteomic analysis of temperature stress-responsive proteins in *Arabidopsis thaliana* rosette  
1000 leaves. *Mol Biosyst* 9: 1257–1267
- 1001 Röhl T, Motzkus M, Soll J (1999) The outer envelope protein OEP24 from pea chloroplasts can  
1002 functionally replace the mitochondrial VDAC in yeast. *FEBS Lett* 460: 491–494
- 1003 Roston RL, Gao J, Murcha MW, Whelan J, Benning C (2012) TGD1, -2, and -3 proteins involved  
1004 in lipid trafficking form ATP-binding cassette (ABC) transporter with multiple substrate-binding  
1005 proteins. *J Biol Chem* 287: 21406–21415
- 1006 Ryoo N, Eom JS, Kim HB, Vo BT, Lee SW, Hahn TR, Jeon JS (2013) Expression and functional  
1007 analysis of rice plastidic maltose transporter, OsMEX1. *J Korean Soc Appl Biol Chem* 56: 149–  
1008 155
- 1009 Sánchez-Fernández R, Davies TG, Coleman JO, Rea PA (2001) The *Arabidopsis thaliana* ABC  
1010 protein superfamily, a complete inventory. *J Biol Chem* 276: 30231–30244
- 1011 Schneider T, Keller F (2009) Raffinose in chloroplasts is synthesized in the cytosol and  
1012 transported across the chloroplast envelope. *Plant Cell Physiol* 50: 2174–2182
- 1013 Schulze WX, Schneider T, Starck S, Martinoia E, Trentmann O (2012) Cold acclimation induces  
1014 changes in *Arabidopsis* tonoplast protein abundance and activity and alters phosphorylation of  
1015 tonoplast monosaccharide transporters. *Plant J* 69: 529–541
- 1016 Serbinova E, Kagan V, Han D, Packer L (1991) Free radical recycling and intramembrane  
1017 mobility in the antioxidant properties of alpha-tocopherol and alpha-tocotrienol. *Free Radic. Biol.*  
1018 *Med* 10: 263–275
- 1019 Sicher R (2011) Carbon partitioning and the impact of starch deficiency on the initial response of  
1020 *Arabidopsis* to chilling temperatures. *Plant Sci* 181: 167–176.
- 1021 Strand A, Hurry V, Gustafsson P, Gardeström P (1997) Development of *Arabidopsis thaliana*  
1022 leaves at low temperatures releases the suppression of photosynthesis and photosynthetic gene  
1023 expression despite the accumulation of soluble carbohydrates. *Plant J* 12: 605–614
- 1024 Sun Q, Zybilov B, Majeran W, Friso G, Olinares PDB, van Wijk KJ (2009) PPDB, the plant  
1025 proteomics database at cornell. *Nucleic Acids Res* 37: D969-74. doi: 10.1093/nar/gkn654.
- 1026 Terry MJ, Smith AG (2013) A model for tetrapyrrole synthesis as the primary mechanism for  
1027 plastid-to-nucleus signaling during chloroplast biogenesis. *Front Plant Sci* 4: 14. doi:  
1028 10.3389/fpls.2013.00014

- 1029 Tewari KA, Tripathy CB (1998) Temperature-stress-induced impairment of chlorophyll  
1030 biosynthetic reactions in cucumber and wheat. *Plant Physiol* 117: 851–858
- 1031 Tewari KA, Tripathy CB (1998) Temperature-stress-induced impairment of chlorophyll  
1032 biosynthetic reactions in cucumber and wheat. *Plant Physiol* 117: 851–858
- 1033 Tewari KA, Tripathy CB (1999) Acclimation of chlorophyll biosynthetic reactions to temperature  
1034 stress in cucumber (*Cucumis sativus* L.). *Planta* 208: 431–437
- 1035 Tjaden J, Möhlmann T, Kampfenkel K, Neuhaus, Henrichs G and H. Ekkehard (1998) Altered  
1036 plastidic ATP/ADP-transporter activity influences potato (*Solanum tuberosum* L.) tuber  
1037 morphology, yield and composition of tuber starch. *Plant J* 16: 531–540
- 1038 Trentmann O, Haferkamp I (2013) Current progress in tonoplast proteomics reveals insights into  
1039 the function of the large central vacuole. *Front Plant Sci* 4: 34. doi: 10.3389/fpls.2013.00034
- 1040 Trentmann O, Jung B, Neuhaus HE, Haferkamp I (2008) Nonmitochondrial ATP/ADP  
1041 transporters accept phosphate as third substrate. *J Bio Chem* 283: 36486–36493
- 1042 van Wijk KJ, Kessler F (2017) Plastoglobuli: Plastid microcompartments with integrated  
1043 functions in metabolism, plastid developmental transitions, and environmental adaptation. *Annu.*  
1044 *Rev. Plant Bio* 68: 253–289
- 1045 Wanner LA, Junttila O (1999) Cold-induced freezing tolerance in *Arabidopsis*. *Plant Physiol* 120:  
1046 391–400
- 1047 Weber A, Servaites JC, Geiger DR, Kofler H, Hille D, Gröner F, Hebbeker U, Flügge UI (2000)  
1048 Identification, purification, and molecular cloning of a putative plastidic glucose translocator.  
1049 *Plant Cell* 12: 787–802
- 1050 Weber APM, Schwacke R, Flügge UI (2005) Solute transporters of the plastid envelope  
1051 membrane. *Annu. Rev. Plant Bio* 56: 133–164
- 1052 Westphal S, Soll J, Vothknecht UC (2001) A vesicle transport system inside chloroplasts. *FEBS*  
1053 *letters* 506: 257–261
- 1054 Witz S, Jung B, Fürst S, Möhlmann T (2012) De novo pyrimidine nucleotide synthesis mainly  
1055 occurs outside of plastids, but a previously undiscovered nucleobase importer provides  
1056 substrates for the essential salvage pathway in *Arabidopsis*. *Plant Cell* 24: 1549–1559
- 1057 Yano R, Nakamura M, Yoneyama T, Nishida I (2005) Starch-related  $\alpha$ -glucan/water dikinase is  
1058 involved in the cold-induced development of freezing tolerance in *Arabidopsis*. *Plant Physiol*  
1059 138: 837–846
- 1060 Zimmer D, Schneider K, Sommer F, Schroda M, Mühlhaus T (2018) Artificial intelligence  
1061 understands peptide observability and assists with absolute protein quantification. *Front Plant*  
1062 *Sci* 9:1559. doi: 10.3389/fpls.2018.01559
- 1063

1064 **Table 1:** Intrinsic or chloroplast envelope associated proteins with changed abundances after 4 days of cold acclimation at 4°C. **TM:**  
1065 number of transmembrane domains, revised using information provided by ARAMEMNON release 8.1 and protein specific publications;  
1066 **Local.:** localisation of the identified proteins based on the AT\_CHLORO and this study, **Ch:** chloroplast, **E:** envelope, **IE:** inner envelope,  
1067 **IO:** outer envelope, **S:** stroma \*: previously predicted envelope localisation confirmed by this study, **new:** by this study identified intrinsic  
1068 or envelope associated proteins

| Gene ID          | Protein names                                                                    |   | log2FC<br>4°C - 22°C | Stdv.<br>log2FC<br>change | TM                    | Local.   |
|------------------|----------------------------------------------------------------------------------|---|----------------------|---------------------------|-----------------------|----------|
| <i>At1g15500</i> | plastidic ATP/ADP antiporter (AATP2/NTT2)                                        | ↑ | +9.69                | 0.33                      | 11                    | Ch/E/IE  |
| <i>At4g17170</i> | putative RAB-B-class small GTPase (RAB-B1b)                                      | ↑ | +7.46                | 0.19                      | 0                     | Ch/E new |
| <i>At5g64840</i> | putative subfamily F ABC protein (ABCF5/GCN5)                                    | ↑ | +10.07               | 0.38                      | 0                     | Ch/E new |
| <i>At5g33320</i> | phosphoenolpyruvate/phosphate translocator (PPT1/CUE1)                           | ↓ | -11.06               | 0.45                      | 7-8                   | Ch/E/IE  |
| <i>At5g17520</i> | maltose translocator (RCP1/MEX1)                                                 | ↓ | -9.05                | 0.27                      | 9                     | Ch/E/IE  |
| <i>At3g51140</i> | putative DnaJ-chaperone-like protein                                             | ↓ | -1.05                | 0.41                      | 4                     | Ch/E/OE  |
| <i>At4g39460</i> | S-adenosylmethionine transporter (SAMC1/SAMT1)                                   | ↓ | -2.07                | 0.76                      | 6                     | Ch/E/IE  |
| <i>At5g16010</i> | putative steroid 5-alpha reductase                                               | ↓ | -10.18               | 0.12                      | 6-7                   | Ch/E *   |
| <i>At4g32400</i> | nucleotide uniporter (SHS1/BT1)                                                  | ↓ | -1.10                | 0.44                      | 6                     | Ch/E/IE  |
| <i>At5g42960</i> | putative OEP24-type outer membrane channel                                       | ↓ | -1.14                | 0.47                      | 0<br>12 β-<br>barrels | Ch/E/OE  |
| <i>At1g65410</i> | putative component of ER-to-thylakoid lipid transfer complex (TGD3/ABCI13/NAP11) | ↓ | -9.25                | 0.52                      | 0                     | Ch/E/IE  |
| <i>At4g33350</i> | chloroplast inner envelope translocon component (Tic22-IV)                       | ↓ | -1.23                | 0.27                      | 0                     | Ch/E/IE  |
| <i>At3g01500</i> | Beta carbonic anhydrase 1, chloroplastic                                         | ↓ | -1.32                | 0.34                      | 0                     | Ch/E new |
| <i>At2g01320</i> | putative subfamily G ABC-type transporter (ABCG7/WBC7)                           | ↓ | -9.52                | 0.54                      | 5                     | Ch/E *   |



|                  |                                                                                                                       |   |       |      |     |                |
|------------------|-----------------------------------------------------------------------------------------------------------------------|---|-------|------|-----|----------------|
| <i>At5g14220</i> | protoporphyrinogen IX oxidase (PPO2)                                                                                  | ↓ | -1.44 | 0.57 | 0   | Ch/E *         |
| <i>At5g12860</i> | plastidic 2-oxoglutarate/malate translocator (DiT1/pOMT1)                                                             | ↓ | -1.45 | 0.90 | 14  | Ch/E/IE        |
| <i>At1g08640</i> | CJD1 (Chloroplast J-like Domain 1) influences fatty acid composition of chloroplast lipids                            | ↓ | -1.47 | 0.37 | 3   | Ch/E/IE        |
| <i>At5g02940</i> | putative Pollux/Castor-type voltage-gated ion channel (Pollux-L1)                                                     | ↓ | -1.48 | 1.20 | 3   | Ch/E *         |
| <i>At2g43630</i> | protein of unknown function                                                                                           | ↓ | -1.53 | 0.37 | 1   | Ch/E/IE        |
| <i>At3g08740</i> | Elongation factor P (EF-P) family protein                                                                             | ↓ | -7.60 | 0.86 | 0   | Ch/E &<br>Ch/S |
| <i>At1g78620</i> | putative phytyl-phosphate kinase (VTE6)                                                                               | ↓ | -1.56 | 0.09 | 6   | Ch/E/IE        |
| <i>At5g23040</i> | putative DnaJ-chaperone-like protein involved in protochlorophyllide oxidoreductase stabilization (CPP1/CDF1/DnaJD11) | ↓ | -1.58 | 0.11 | 3-4 | Ch/E/IE        |
| <i>At2g45740</i> | member of the peroxin11 (PEX11) gene family                                                                           | ↓ | -7.66 | 0.37 | 1-3 | Ch/E/IE        |
| <i>At1g10510</i> | RNI-like superfamily protein EMBRYO DEFECTIVE 2004                                                                    | ↓ | -0.65 | 0.20 | 1   | Ch/E/IE        |
| <i>At3g10840</i> | putative alpha/beta-fold-type hydrolase                                                                               | ↓ | -9.74 | 0.36 | 0-2 | Ch/S           |
| <i>At3g32930</i> | protein of unknown function                                                                                           | ↓ | -7.72 | 0.39 | 0   | Ch/S           |
| <i>At2g17695</i> | putative chloroplast outer envelope solute channel (OEP23)                                                            | ↓ | -7.74 | 0.44 | 0   | Ch/E *         |
| <i>At2g42770</i> | putative PMP22/Mpv17-type protein of unknown function                                                                 | ↓ | -0.71 | 0.09 | 2-4 | Ch/E/IE        |
| <i>At3g20330</i> | aspartate carbamoyltransferase (ATCase)                                                                               | ↓ | -9.80 | 0.87 | 0   | Ch/E/IE        |
| <i>At2g24820</i> | putative component of inner envelope protein import machinery   phyllobilin hydroxylase (TIC55/Tic55-II)              | ↓ | -0.76 | 0.37 | 2   | Ch/E/IE        |
| <i>At3g57280</i> | plastid fatty acid exporter (FAX1)                                                                                    | ↓ | -1.77 | 0.31 | 4   | Ch/E/IE        |
| <i>At5g42130</i> | putative (animal Mitoferrin)-like carrier (MFL1)                                                                      | ↓ | -0.79 | 0.20 | 6   | Ch/E/IE        |
| <i>At3g49560</i> | putative tRNA import component of mitochondrial membrane translocase machinery (TRIC1/PRAT2.1/HP30-1)                 | ↓ | -0.81 | 0.27 | 2-4 | Ch/E/IE        |



|                         |                                                                                                     |   |              |      |   |                 |
|-------------------------|-----------------------------------------------------------------------------------------------------|---|--------------|------|---|-----------------|
| <b><i>At3g56910</i></b> | <b>putative plastid-specific ribosomal protein (PSRP5)</b>                                          | ↓ | <b>-0.85</b> | 0.59 | 0 | Ch/E/IE         |
| <b><i>At4g28620</i></b> | <b>putative subfamily B ABC-type transporter (ABCB24/ATM2)</b>                                      | ↓ | <b>-0.88</b> | 0.73 | 6 | Ch/E <b>new</b> |
| <b><i>At3g63410</i></b> | <b>methyl-6-phytyl-1,4-hydroquinone methyltransferase (APG1/VTE3)</b>                               | ↓ | <b>-0.92</b> | 0.62 | 1 | Ch/E/IE         |
| <b><i>At3g20320</i></b> | <b>putative substrate-binding component of ER-to-thylakoid lipid transfer complex (TGD2/ABCI15)</b> | ↓ | <b>-1.99</b> | 1.71 | 1 | Ch/E/IE         |
| <b><i>At2g35800</i></b> | <b>putative calcium-dependent S-adenosyl methionine carrier (SAMTL)</b>                             | ↓ | <b>-0.99</b> | 0.39 | 2 | Ch/E *          |

1069

1070

1071

1072 **Table 2:** Identified proteins exhibiting a differential localization (diffloc) at envelope membrane

| <b>Gene ID</b>   | <b>Protein names</b>                                                                         | <b>diffloc</b> | <b>q value<br/>diffloc</b> |
|------------------|----------------------------------------------------------------------------------------------|----------------|----------------------------|
| <i>At3g44380</i> | late embryogenesis abundant (LEA) hydroxyproline-rich glycoprotein family                    | -12,37         | 6,88E-10                   |
| <i>At4g23430</i> | translocon at the inner envelope membrane of chloroplasts 32-IVa                             | -10.75         | 4,66E-09                   |
| <i>At1g11320</i> | GDSL esterase/lipase                                                                         | -10.35         | 2,54E-09                   |
| <i>At5g51070</i> | chaperone component of Clp-type protease complex (ClpD/ERD1)                                 | -10.25         | 2,57E-08                   |
| <i>At5g55510</i> | putative chloroplast envelope translocase component (PRAT1.2/HP22)                           | -10.04         | 9,46E-09                   |
| <i>At5g14100</i> | subfamily I ABC protein (ABCI11/NAP14)                                                       | -9,94          | 1,21E-09                   |
| <i>At3g63170</i> | putative CHI-fold fatty-acid-binding protein (FAP1)                                          | -9.77          | 0,000000239                |
| <i>At4g33460</i> | putative subfamily I ABC protein (ABCI10/NAP13)                                              | -9.59          | 1,14E-08                   |
| <i>At1g66670</i> | proteolytic component of Clp-type protease core complex (ClpP3/nClpP3)                       | -9.37          | 8,48E-09                   |
| <i>At3g23700</i> | putative S1-type protein of small ribosomal subunit                                          | -9.23          | 6,78E-10                   |
| <i>At5g45170</i> | haloacid dehalogenase-like hydrolase (HAD) superfamily protein                               | -9.19          | 0,000000163                |
| <i>At1g52670</i> | putative regulator of acetyl-CoA carboxylase complex (BAD2)                                  | -8.68          | 4,77E-09                   |
| <i>At3g19720</i> | chloroplast fission mediator (DRP5B/AtARC5)                                                  | -8.64          | 2,31E-08                   |
| <i>At1g63610</i> | protein of unknown function                                                                  | -8.58          | 0,000000104                |
| <i>At3g13470</i> | putative component of plastidial Cpn60 chaperonin complex (CPN60B2)                          | -7.67          | 1,27E-08                   |
| <i>At1g76180</i> | Early Response to Dehydration (ERD14)                                                        | -7.06          | 0,000000172                |
| <i>At5g14740</i> | beta carbonic anhydrase (BCA2/AtCA2)                                                         | -0.56          | 0,026906612                |
| <i>At4g13010</i> | inner envelope quinone-oxidoreductase, lacking cleavable N-terminal transit peptide (ceQORH) | -0.25          | 0,049506466                |
| <i>At1g12410</i> | non-proteolytic component of Clp-type protease core complex (ClpR2/nClpP2)                   | 0.41           | 0,0016654                  |

|                  |                                                                    |              |             |
|------------------|--------------------------------------------------------------------|--------------|-------------|
| <i>At3g10230</i> | lycopene beta-cyclase (LCY-B)                                      | <b>5.99</b>  | 0,000000312 |
| <i>At3g26085</i> | CAAX amino terminal protease family protein                        | <b>6.08</b>  | 0,00000979  |
| <i>At5g64816</i> | protein of unknown function                                        | <b>7.38</b>  | 0,000000128 |
| <i>At4g34120</i> | protein of unknown function, contains CBS-type domain (LEJ1/CDCP1) | <b>8.43</b>  | 7,71E-08    |
| <i>At2g40490</i> | uroporphyrinogen decarboxylase (HEME2)                             | <b>10.52</b> | 1,95E-09    |

1073

1074

1075

1076

1077 **Table 3:** Identified proteins exhibiting a differential localization at the envelope but also a difference in total abundance

| <b>Gene ID</b>   | <b>Protein names</b>                                                                        | <b>diffloc</b> | <b>q value<br/>diffloc</b> | <b>log2-FC<br/>4°C - 22°C</b> |
|------------------|---------------------------------------------------------------------------------------------|----------------|----------------------------|-------------------------------|
| <b>AT3G20330</b> | <b>aspartate carbamoyltransferase (ATCase)</b>                                              | <b>12,57</b>   | 0,0009683                  | -9,80                         |
| <b>AT3G10840</b> | <b>putative alpha/beta-fold-type hydrolas</b>                                               | <b>9,056</b>   | 0,00000719                 | -9,742                        |
| <b>AT1G65410</b> | <b>putative component of ER-to-thylakoid lipid transfer complex<br/>(TGD3/ABCI13/NAP11)</b> | <b>8,17</b>    | 0,000191721                | -9,25                         |
| <b>AT3G32930</b> | <b>protein of unknown function</b>                                                          | <b>6,17</b>    | 4,74E-08                   | -7,72                         |
| <b>AT3G08740</b> | <b>Elongation factor P (EF-P) family protein</b>                                            | <b>6,67</b>    | 0,000000138                | -7,60                         |
| <b>AT5G64840</b> | <b>putative subfamily F ABC protein (ABCF5/GCN5)</b>                                        | <b>-1,07</b>   | 0,009831283                | 10,07                         |

1078

1079

1080 **Figure legends**

1081

1082 **Figure 1: A** Schematic drawing illustration cold acclimation and organelle/envelope isolation. **B**  
1083 Graphical representation of the score distribution learned from protein features with known  
1084 envelope localization (light green) and proteins from other compartments (dark green). The  
1085 divergence between the distributions allows separating the two different classes by the score  
1086 behavior based on the selected protein features. False discovery rate (grey) was calculated after  
1087 10-fold cross-validation using the knowledge from all previously known protein localization in the  
1088 data set.

1089

1090 **Figure 2:** Pie chart demonstrating the general quality of the performed envelope proteome  
1091 study. Localization of the identified proteins described by hierarchically organized localization  
1092 ontology. Multiple ontology tags indicate either technical indistinguishable or a biological  
1093 meaningful multi-localization of the respective proteins.

1094

1095 **Figure 3:** Effect of freezing to -10°C on WT (Col-0), *ntt2* T-DNA insertion mutant, *ntt1* T-DNA  
1096 insertion mutant and the double *ntt1* and *ntt2* (*ntt1/2*) T-DNA insertion mutant. Plants were  
1097 cultivated for 17 days under standard conditions (22°C day temperature, 18°C night  
1098 temperature, day length 10h, relative humidity 60% and 120μE light intensity). Subsequent the  
1099 temperature was lowered to 4°C day and night temperature (4 day cold acclimation) and  
1100 afterwards the temperature was further lowered to -10°C (stepwise 2°C/hour). -10°C was kept  
1101 for 15 hours before the temperature was raised again to 22°C (stepwise 2°C/hour). **A:** picture of  
1102 WT, *ntt2*, *ntt1* and *ntt1/2* mutant plants recovered from -10°C freezing for 3 weeks. **B:**  
1103 comparison of 6 week old WT, *ntt2*, *ntt1* and *ntt1/2* mutant plants with and without -10°C  
1104 freezing treatment. **C:** quantification of wilted leaves from -10°C treated plants after 3 weeks  
1105 recovery under standard growing conditions. The picture in C demonstrates in more detail how  
1106 leaves were categorized as “wilted”. Statistics: n = 10, \*\*\* indicates a P value < 0.001 estimated  
1107 by student’s t-test.

1108

1109 **Figure 4:** Effect of freezing to  $-10^{\circ}\text{C}$  on WT (Col-0), *mex1-1* loss of function mutation and the  
1110 *mex* overexpressor plants *pUBQ10::MEX1-1* and *pUBQ10::MEX1-2*. Plants were cultivated for  
1111 17 days under standard conditions ( $22^{\circ}\text{C}$  day temperature,  $18^{\circ}\text{C}$  night temperature, day length  
1112 10h, relative humidity 60% and  $120\mu\text{E}$  light intensity). Subsequent the temperature was lowered  
1113 to  $4^{\circ}\text{C}$  day and night temperature (4 day cold acclimation) and afterwards the temperature was  
1114 further lowered to  $-10^{\circ}\text{C}$  (stepwise  $2^{\circ}\text{C}/\text{hour}$ ).  $-10^{\circ}\text{C}$  was kept for 15 hours before the  
1115 temperature was raised again to  $22^{\circ}\text{C}$  (stepwise  $2^{\circ}\text{C}/\text{hour}$ ). A: picture of WT, *mex1-1* mutation  
1116 and overexpressor plants recovered from  $-10^{\circ}\text{C}$  freezing for 3 weeks. B: quantification of wilted  
1117 leaves from  $-10^{\circ}\text{C}$  treated plants after 3 weeks recovery under standard growing conditions.  
1118 Statistics:  $n = 7$ , \*\*\* indicates a P value  $< 0.001$  and \*\* a P value  $< 0.01$  estimated by student's t-  
1119 test.

1120  
1121 **Figure 5:** Cold dependent differentially localization of non-intrinsic envelope membrane  
1122 associated proteins accessed by mass spectrometry. Proteins with a positive  $\log_2\text{FC}$  change  
1123 determined by the factor of their enrichment exhibit a higher abundance in the envelope fraction  
1124 under cold treatment and vice versa. Proteins exhibiting a rather small differential localization  
1125 are indicated by grey dots.

1126

1127

Figure 1

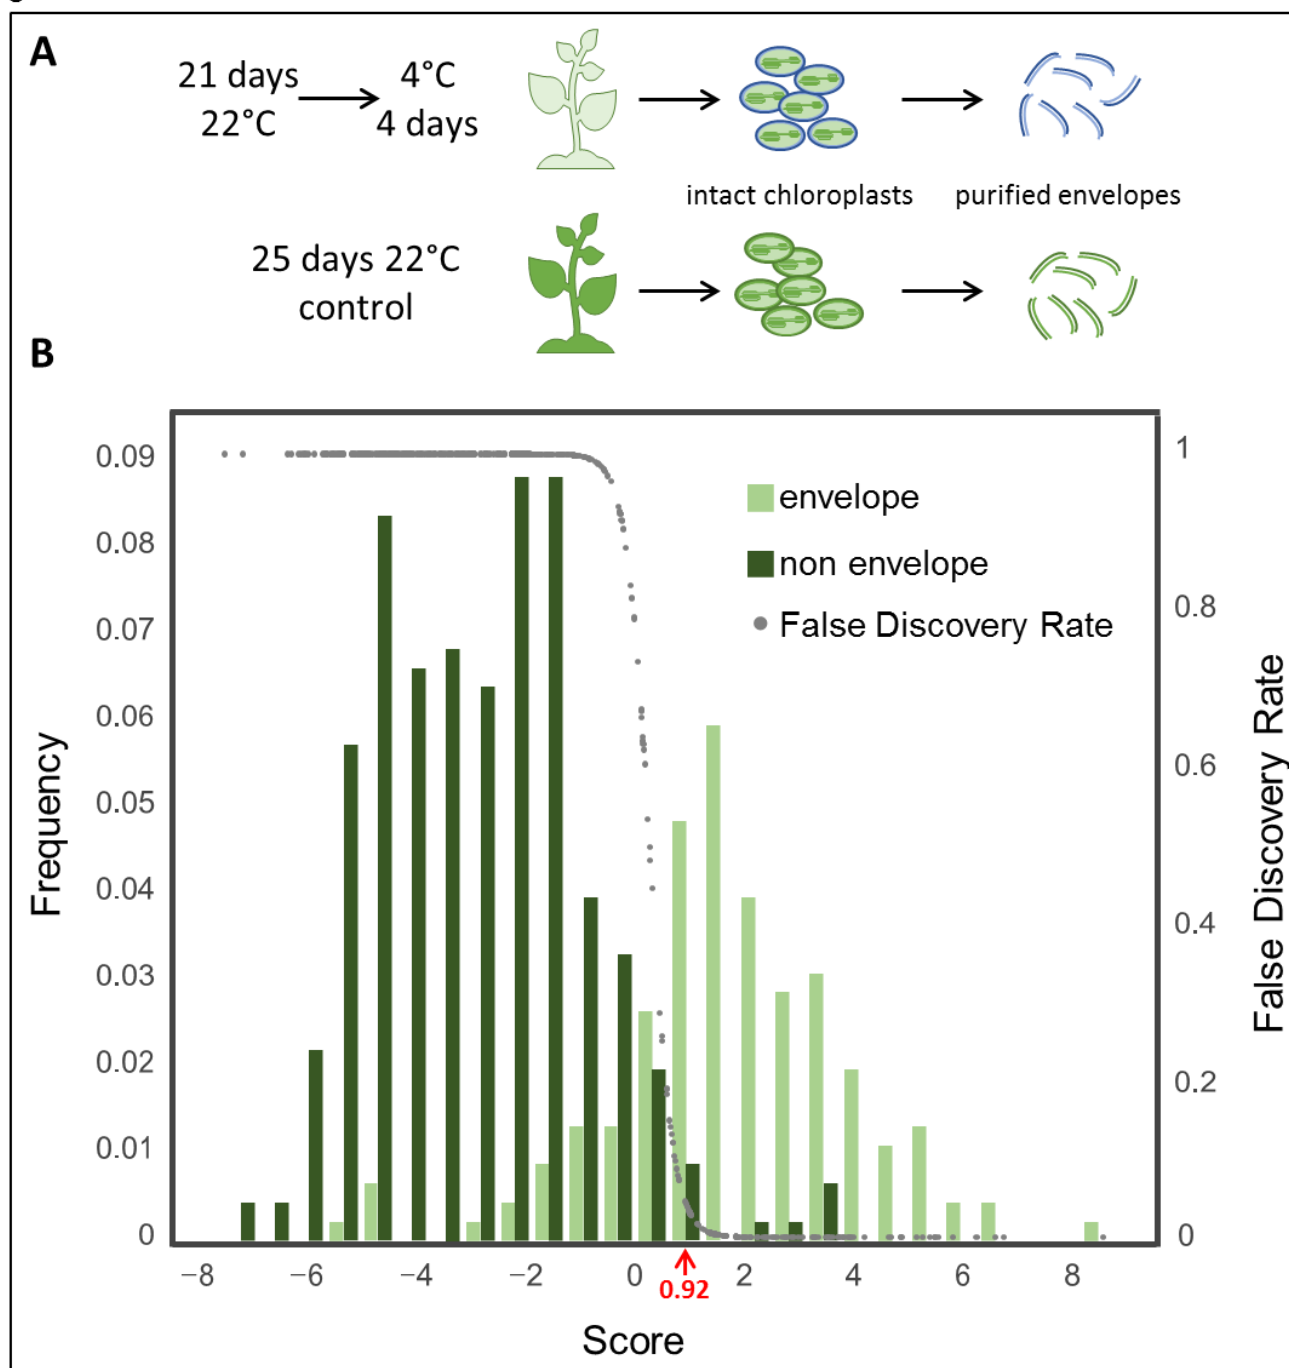

**Figure 1:** **A** Schematic drawing illustration cold acclimation and organelle/envelope isolation. **B** Graphical representation of the score distribution learned from protein features with known envelope localization (light green) and proteins from other compartments (dark green). The divergence between the distributions allows separating the two different classes by the score behavior based on the selected protein features. False discovery rate (grey) was calculated after 10-fold cross-validation using the knowledge from all previously known protein localization in the data set.



Figure 2

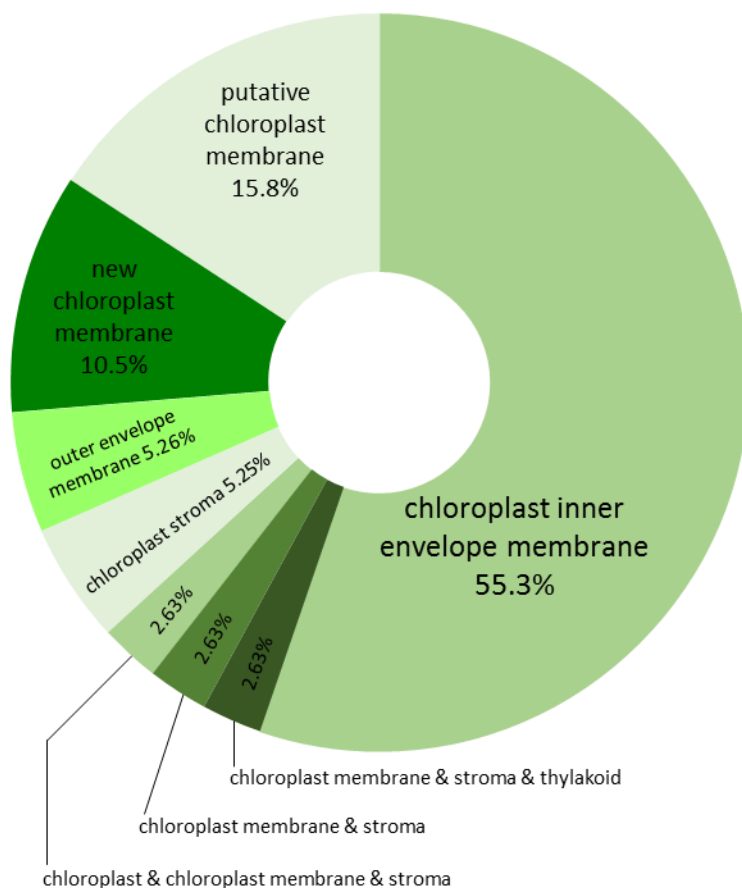

**Figure 2:** Pie chart demonstrating the general quality of the performed envelope proteome study. Localization of the identified proteins described by hierarchically organized localization ontology. Multiple ontology tags indicate either technical indistinguishable or a biological meaningful multi-localization of the respective proteins.

1129

1130

Figure 3

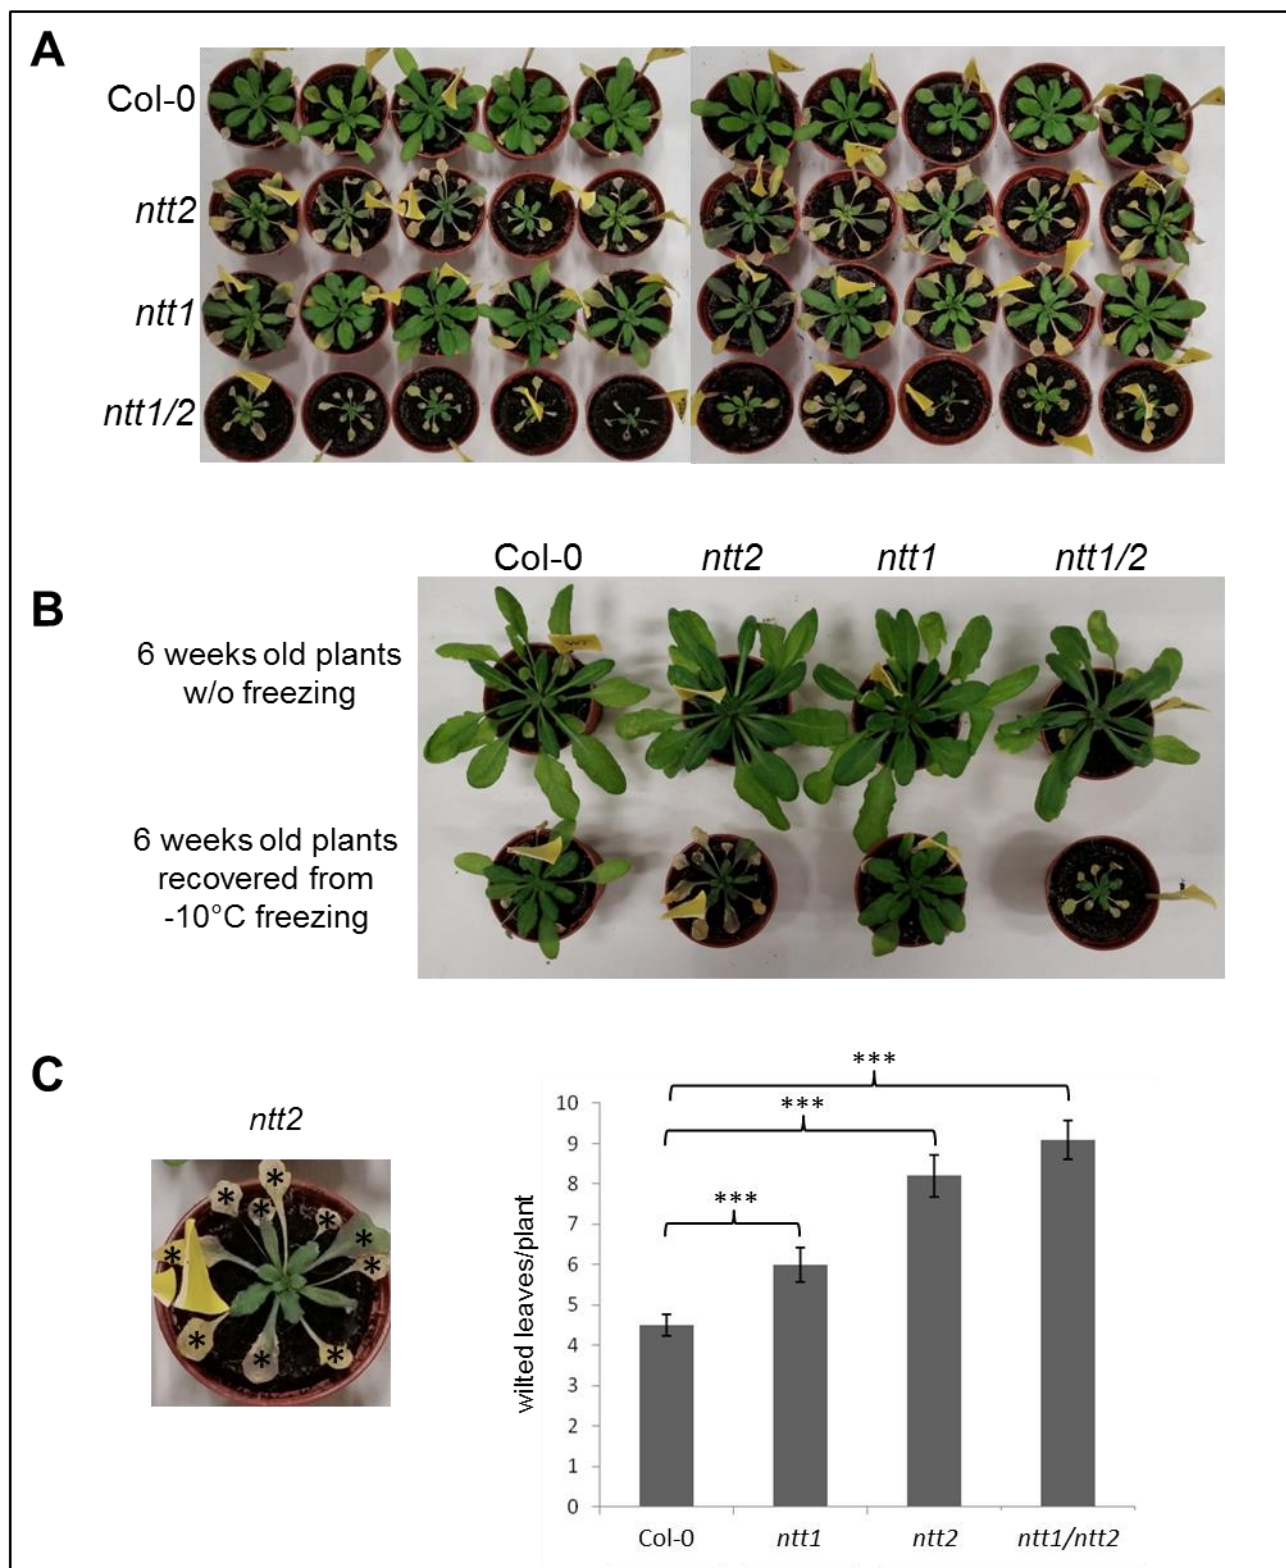

**Figure 3:** Effect of freezing to  $-10^{\circ}\text{C}$  on WT (Col-0), *ntt2* T-DNA insertion mutant, *ntt1* T-DNA insertion mutant and the double *ntt1* and *ntt2* (*ntt1/2*) T-DNA insertion mutant. Plants were cultivated for 17 days under standard conditions ( $22^{\circ}\text{C}$  day temperature,  $18^{\circ}\text{C}$  night temperature, day length 10h, relative humidity 60% and  $120\mu\text{E}$  light intensity). Subsequent the temperature was lowered to  $4^{\circ}\text{C}$  day and night temperature (4 day cold acclimation) and afterwards the temperature was further lowered to  $-10^{\circ}\text{C}$  (stepwise  $2^{\circ}\text{C}/\text{hour}$ ).  $-10^{\circ}\text{C}$  was kept for 15 hours before the temperature was raised again to  $22^{\circ}\text{C}$  (stepwise  $2^{\circ}\text{C}/\text{hour}$ ). **A:** picture of WT, *ntt2*, *ntt1* and *ntt1/2* mutant plants recovered from  $-10^{\circ}\text{C}$  freezing for 3 weeks. **B:** comparison of 6 week old WT, *ntt2*, *ntt1* and *ntt1/2* mutant plants with and without  $-10^{\circ}\text{C}$  freezing treatment. **C:** quantification of wilted leaves from  $-10^{\circ}\text{C}$  treated plants after 3 weeks recovery under standard growing conditions. The picture in C demonstrates in more detail how leaves were categorized as “wilted”. Statistics:  $n = 10$ , \*\*\* indicates a P value  $< 0.001$  estimated by student’s t-test.

1132

1133

Figure 4

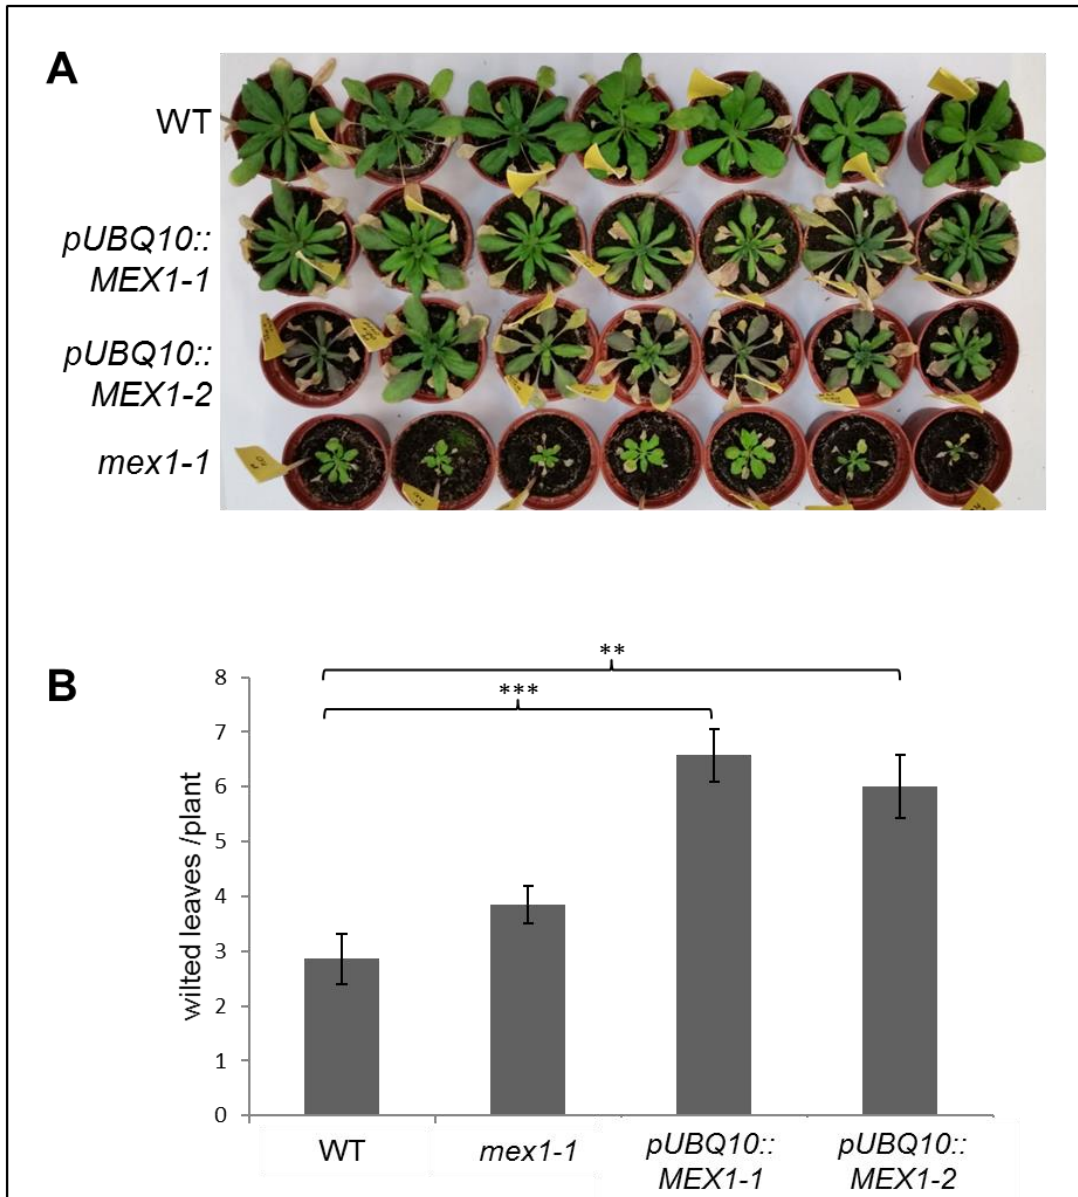

**Figure 4:** Effect of freezing to  $-10^{\circ}\text{C}$  on WT (Col-0), *mex1-1* loss of function mutation and the *mex* over-expressor plants *pUBQ10::MEX1-1* and *pUBQ10::MEX1-2*. Plants were cultivated for 17 days under standard conditions ( $22^{\circ}\text{C}$  day temperature,  $18^{\circ}\text{C}$  night temperature, day length 10h, relative humidity 60% and  $120\mu\text{E}$  light intensity). Subsequent the temperature was lowered to  $4^{\circ}\text{C}$  day and night temperature (4 day cold acclimation) and afterwards the temperature was further lowered to  $-10^{\circ}\text{C}$  (stepwise  $2^{\circ}\text{C}/\text{hour}$ ).  $-10^{\circ}\text{C}$  was kept for 15 hours before the temperature was raised again to  $22^{\circ}\text{C}$  (stepwise  $2^{\circ}\text{C}/\text{hour}$ ). **A:** picture of WT, *mex1-1* mutation and over-expressor plants recovered from  $-10^{\circ}\text{C}$  freezing for 3 weeks. **B:** quantification of wilted leaves from  $-10^{\circ}\text{C}$  treated plants after 3 weeks recovery under standard growing conditions. Statistics:  $n = 7$ , \*\*\* indicates a P value < 0.001 and \*\* a P value < 0.01 estimated by student's t-test.

Figure 5

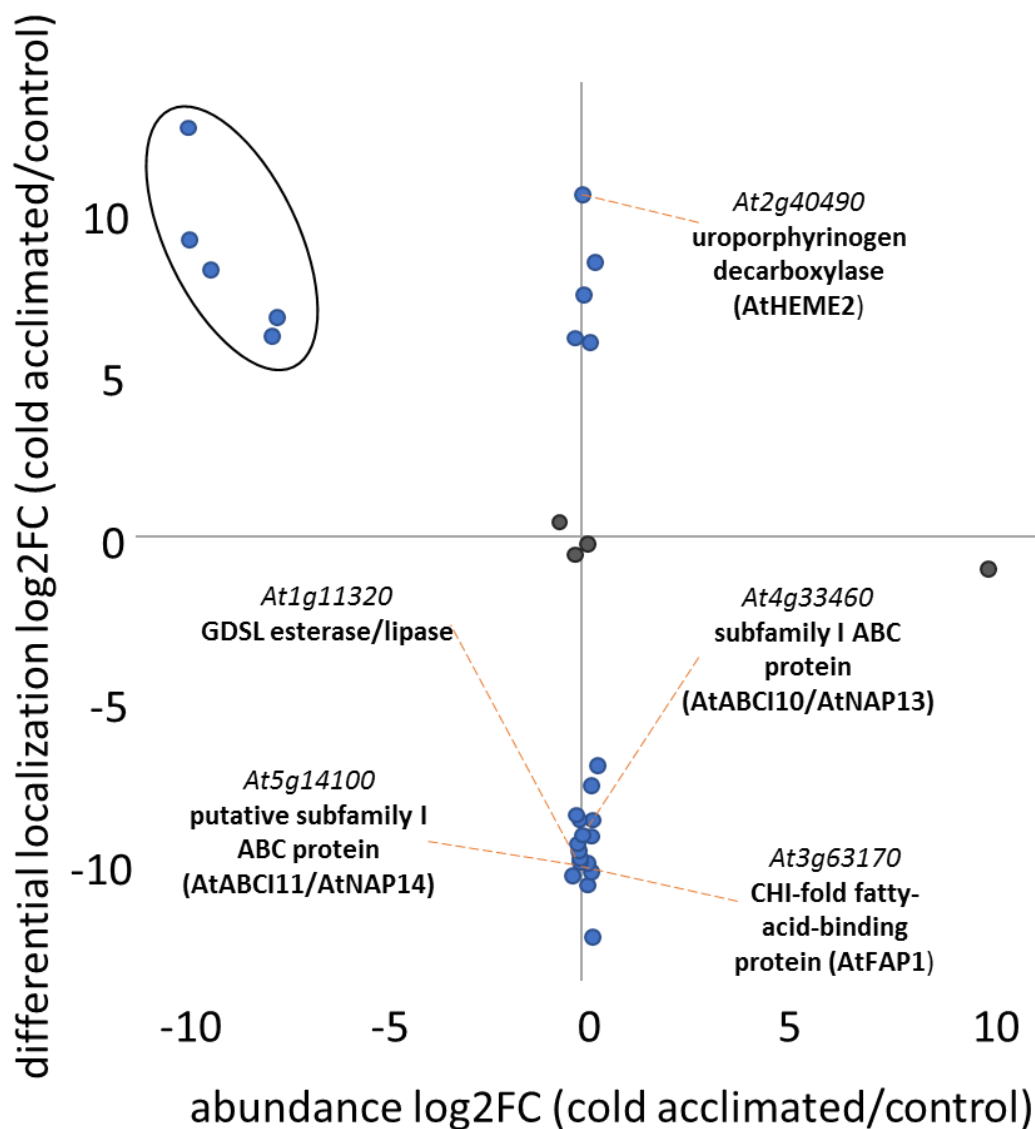

**Figure 5:** Cold dependent differential localization of non-intrinsic envelope membrane associated proteins accessed by mass spectrometry. Proteins with a positive log<sub>2</sub>FC change determined by the factor of their enrichment exhibit a higher abundance in the envelope fraction under cold treatment and vice versa. Proteins exhibiting a rather small differential localization are indicated by grey dots.

Figure 1

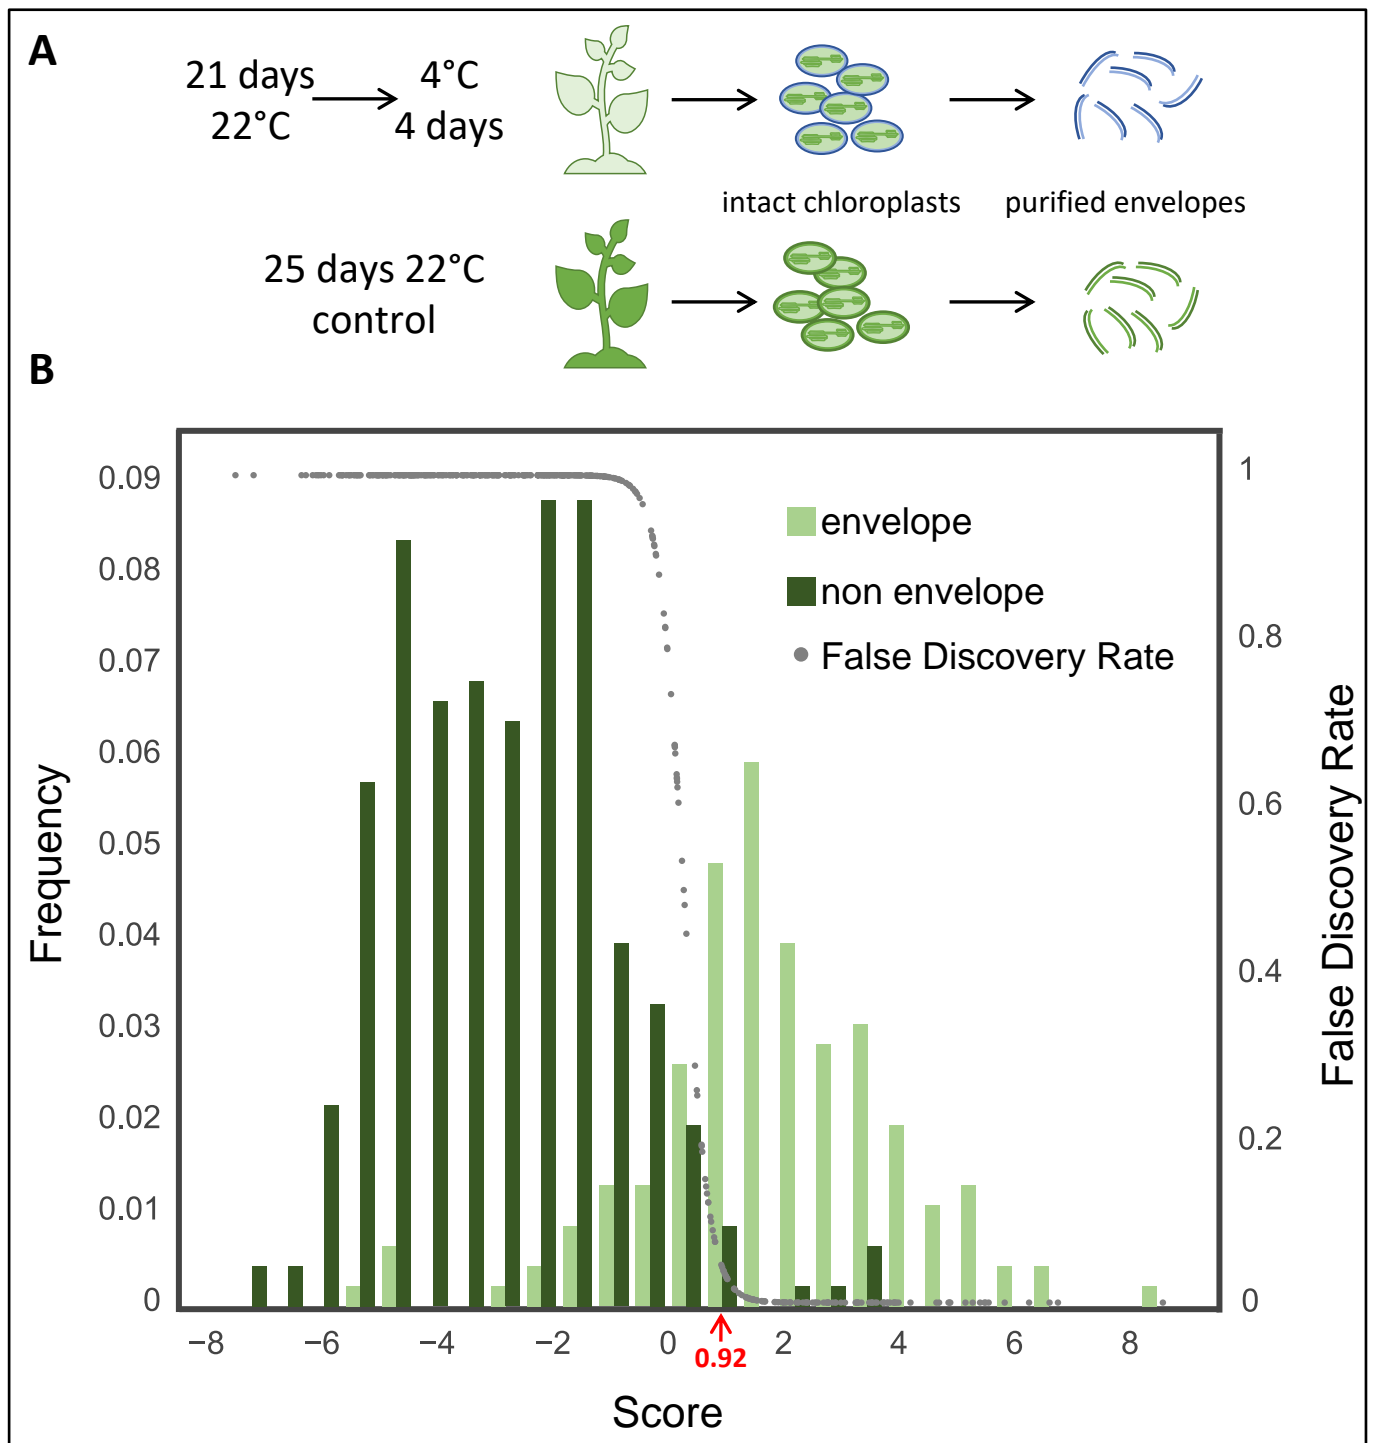

**Figure 1: A** Schematic drawing illustration cold acclimation and organelle/envelope isolation. **B** Graphical representation of the score distribution learned from protein features with known envelope localization (light green) and proteins from other compartments (dark green). The divergence between the distributions allows separating the two different classes by the score behavior based on the selected protein features. False discovery rate (grey) was calculated after 10-fold cross-validation using the knowledge from all previously known protein localization in the data set.



Figure 2

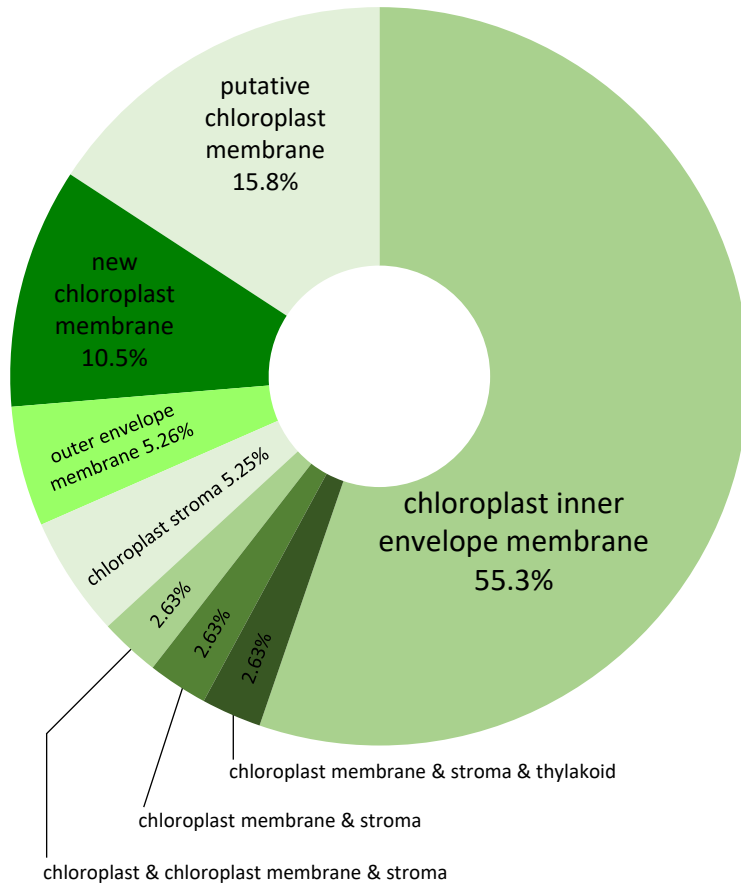

**Figure 2:** Pie chart demonstrating the general quality of the performed envelope proteome study. Localization of the identified proteins described by hierarchically organized localization ontology. Multiple ontology tags indicate either technical indistinguishable or a biological meaningful multi-localization of the respective proteins.

Figure 3

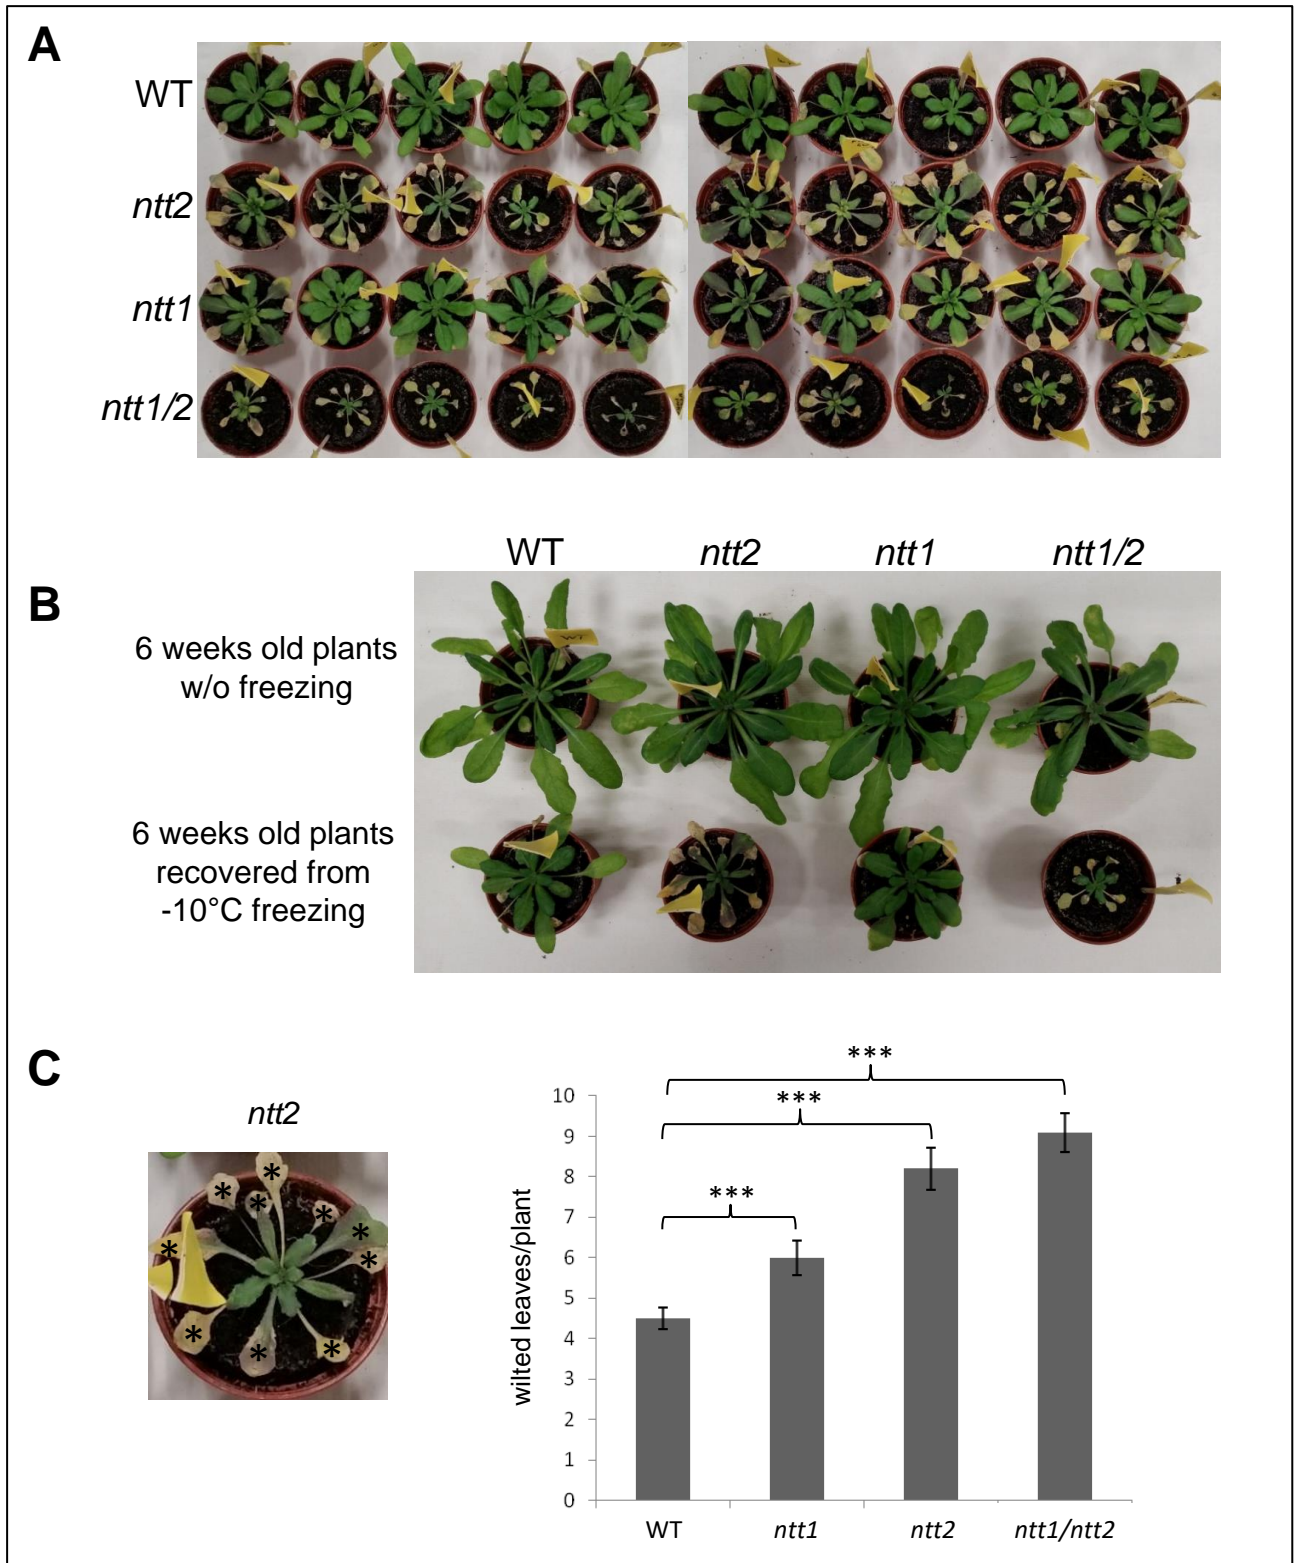

**Figure 3:** Effect of freezing to  $-10^{\circ}\text{C}$  on WT (Col-0), *ntt2* T-DNA insertion mutant, *ntt1* T-DNA insertion mutant and the double *ntt1* and *ntt2* (*ntt1/2*) T-DNA insertion mutant. Plants were cultivated for 17 days under standard conditions ( $22^{\circ}\text{C}$  day temperature,  $18^{\circ}\text{C}$  night temperature, day length 10h, relative humidity 60% and  $120\mu\text{E}$  light intensity). Subsequent the temperature was lowered to  $4^{\circ}\text{C}$  day and night temperature (4 day cold acclimation) and afterwards the temperature was further lowered to  $-10^{\circ}\text{C}$  (stepwise  $2^{\circ}\text{C}/\text{hour}$ ).  $-10^{\circ}\text{C}$  was kept for 15 hours before the temperature was raised again to  $22^{\circ}\text{C}$  (stepwise  $2^{\circ}\text{C}/\text{hour}$ ). **A:** picture of WT, *ntt2*, *ntt1* and *ntt1/2* mutant plants recovered from  $-10^{\circ}\text{C}$  freezing for 3 weeks. **B:** comparison of 6 week old WT, *ntt2*, *ntt1* and *ntt1/2* mutant plants with and without  $-10^{\circ}\text{C}$  freezing treatment. **C:** quantification of wilted leaves from  $-10^{\circ}\text{C}$  treated plants after 3 weeks recovery under standard growing conditions. The picture in C demonstrates in more detail how leaves were categorized as “wilted”. Statistics:  $n = 10$ , \*\*\* indicates a P value  $< 0.001$  estimated by student's t-test.

Figure 4

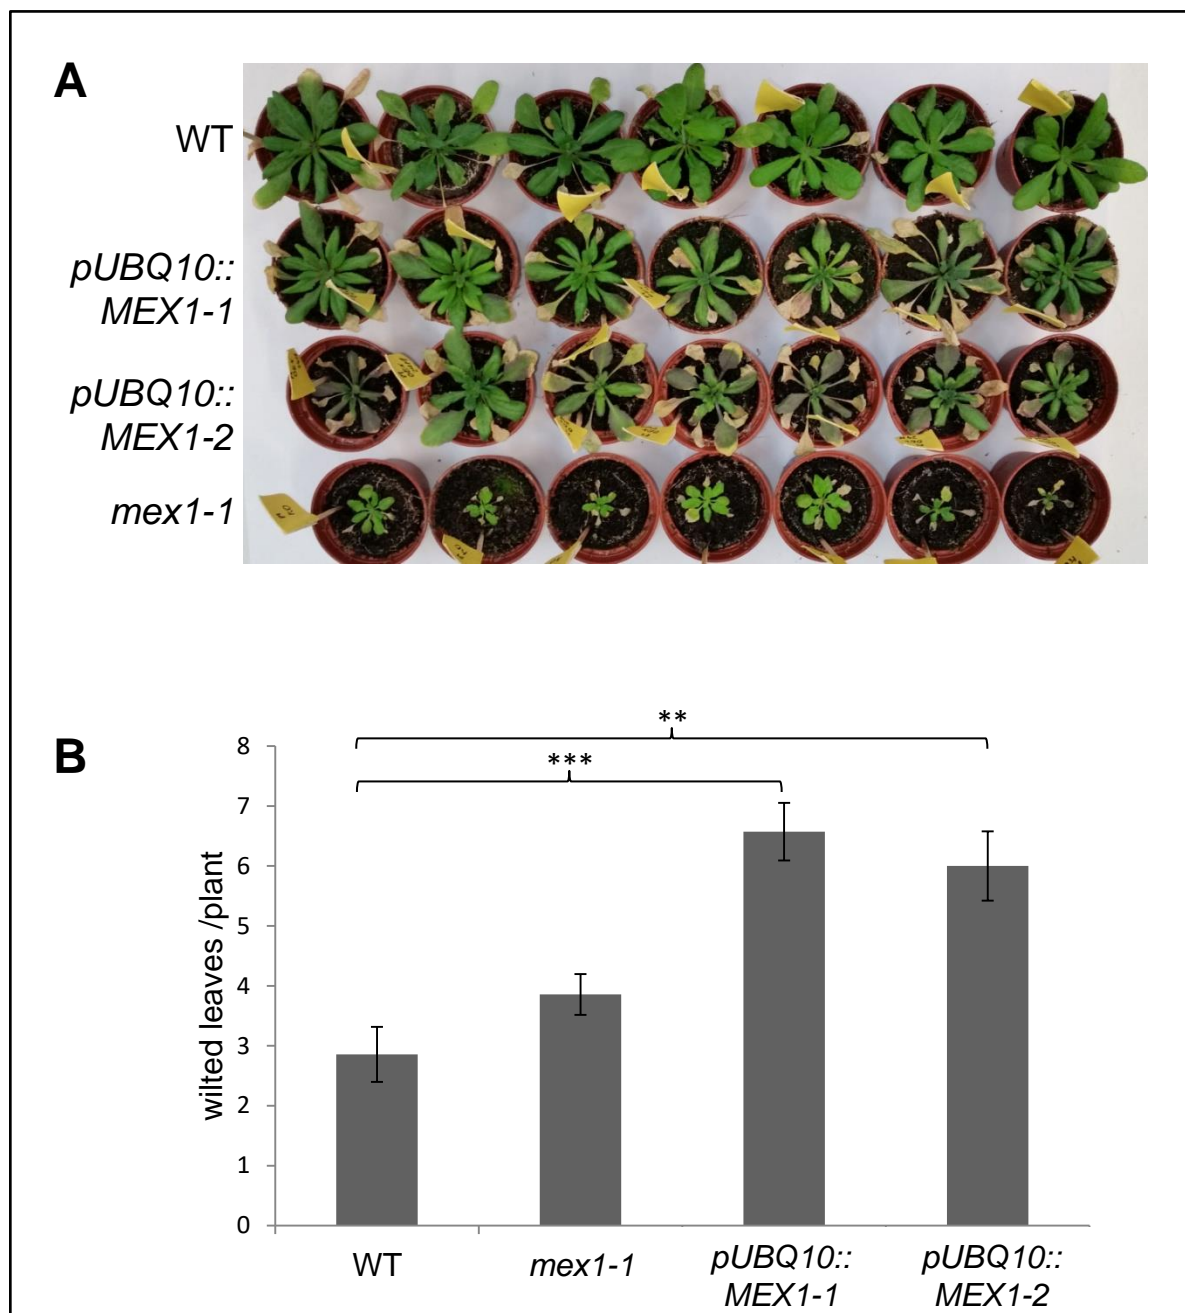

**Figure 4:** Effect of freezing to  $-10^{\circ}\text{C}$  on WT (Col-0), *mex1-1* loss of function mutation and the *mex* over-expressor plants *pUBQ10::MEX1-1* and *pUBQ10::MEX1-2*. Plants were cultivated for 17 days under standard conditions ( $22^{\circ}\text{C}$  day temperature,  $18^{\circ}\text{C}$  night temperature, day length 10h, relative humidity 60% and  $120\mu\text{E}$  light intensity). Subsequent the temperature was lowered to  $4^{\circ}\text{C}$  day and night temperature (4 day cold acclimation) and afterwards the temperature was further lowered to  $-10^{\circ}\text{C}$  (stepwise  $2^{\circ}\text{C}/\text{hour}$ ).  $-10^{\circ}\text{C}$  was kept for 15 hours before the temperature was raised again to  $22^{\circ}\text{C}$  (stepwise  $2^{\circ}\text{C}/\text{hour}$ ). **A:** picture of WT, *mex1-1* mutation and over-expressor plants recovered from  $-10^{\circ}\text{C}$  freezing for 3 weeks. **B:** quantification of wilted leaves from  $-10^{\circ}\text{C}$  treated plants after 3 weeks recovery under standard growing conditions. Statistics:  $n = 7$ , \*\*\* indicates a P value  $< 0.001$  and \*\* a P value  $< 0.01$  estimated by student's t-test.

Figure 5

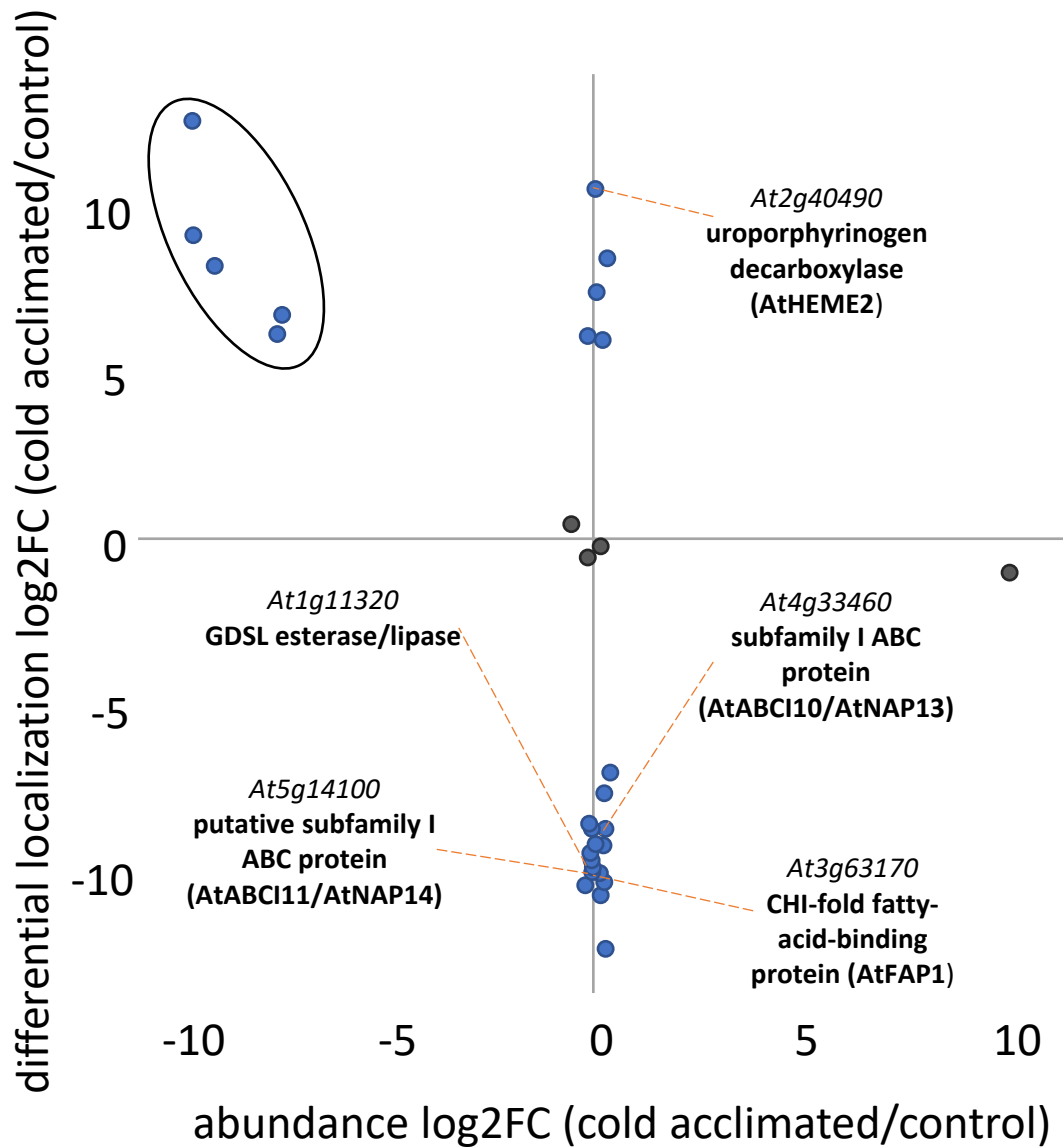

**Figure 5:** Cold dependent differential localization of non-intrinsic envelope membrane associated proteins accessed by mass spectrometry. Proteins with a positive log<sub>2</sub>FC change determined by the factor of their enrichment exhibit a higher abundance in the envelope fraction under cold treatment and vice versa. Proteins exhibiting a rather small differential localization are indicated by grey dots.

## Parsed Citations

**Ajjawi I, Coku A, Froehlich JE, Yang Y, Osteryoung KW, Benning C, Last RL (2011) A J-like protein influences fatty acid composition of chloroplast lipids in Arabidopsis. PLoS ONE 6 (10): e25368. doi: 10.1371/journal.pone.0025368**

Pubmed: [Author and Title](#)

Google Scholar: [Author Only](#) [Title Only](#) [Author and Title](#)

**Alberdi M, Corcuera LJ (1991) Cold acclimation in plants. Phytochemistry (United Kingdom)**

Pubmed: [Author and Title](#)

Google Scholar: [Author Only](#) [Title Only](#) [Author and Title](#)

**Amme S, Matros A, Schlesier B, Mock HP (2006) Proteome analysis of cold stress response in Arabidopsis thaliana using DIGE-technology. J Exp Bot 57: 1537–1546.**

Pubmed: [Author and Title](#)

Google Scholar: [Author Only](#) [Title Only](#) [Author and Title](#)

**Awai K, Xu C, Tamot B, Benning C (2006) A phosphatidic acid-binding protein of the chloroplast inner envelope membrane involved in lipid trafficking. Proc Natl Acad Sci USA 103: 10817–10822**

Pubmed: [Author and Title](#)

Google Scholar: [Author Only](#) [Title Only](#) [Author and Title](#)

**Bang WY, Hata A, Jeong IS, Umada T, Masuda T, Chen J, Yoko I, Suwastika IN, Kim DW, Im CH, Lee BH, Lee Y, Lee KW, Shiina T, Bahk JD (2009) AtObgC, a plant ortholog of bacterial Obg, is a chloroplast-targeting GTPase essential for early embryogenesis. Plant Mol Biol 71: 379–390**

Pubmed: [Author and Title](#)

Google Scholar: [Author Only](#) [Title Only](#) [Author and Title](#)

**Barrero-Sicilia C, Silvestre S, Haslam RP, Michaelson LV (2017) Lipid remodelling: Unravelling the response to cold stress in Arabidopsis and its extremophile relative Eutrema salsugineum. Plant Sci 263: 194–200**

Pubmed: [Author and Title](#)

Google Scholar: [Author Only](#) [Title Only](#) [Author and Title](#)

**Bouchnak I, Brugière S, Moyet L, Le Gall S, Salvi D, Kuntz, Marcel K, Tardif M, Rolland N (2019) Unraveling Hidden Components of the Chloroplast Envelope Proteome: Opportunities and Limits of Better MS Sensitivity. MCP 18: 1285–1306.**

Pubmed: [Author and Title](#)

Google Scholar: [Author Only](#) [Title Only](#) [Author and Title](#)

**Bradford MM (1976) A rapid and sensitive method for the quantitation of microgram quantities of protein utilizing the principle of protein-dye binding. Anal Biochem 72: 248–254**

Pubmed: [Author and Title](#)

Google Scholar: [Author Only](#) [Title Only](#) [Author and Title](#)

**Bruley C, Dupierris V, Salvi D, Rolland N, Ferro M (2012) AT\_CHLORO: A chloroplast protein database dedicated to sub-plastidial localization. Front Plant Sci 3: 205. doi: 10.3389/fpls.2012.00205**

Pubmed: [Author and Title](#)

Google Scholar: [Author Only](#) [Title Only](#) [Author and Title](#)

**BB Buchanan (2015) Biochemistry & molecular biology of plants, Ed. 2. Wiley Blackwell; American Society of Plant Biologists, Chichester, Rockville, Md, USA**

Pubmed: [Author and Title](#)

Google Scholar: [Author Only](#) [Title Only](#) [Author and Title](#)

**Calixto CPG, Guo W, James AB, Tzioutziou NA, Entizne JC, Panter PE, Knight H, Nimmo HG, Zhang R, Brown JWS (2018) Rapid and dynamic alternative splicing impacts the Arabidopsis cold response transcriptome. Plant Cell 30: 1424–1444**

Pubmed: [Author and Title](#)

Google Scholar: [Author Only](#) [Title Only](#) [Author and Title](#)

**Camacho L, Smertenko AP, Pérez-Gómez J, Hussey PJ, Moore I (2009) Arabidopsis Rab-E GTPases exhibit a novel interaction with a plasma-membrane phosphatidylinositol-4-phosphate 5-kinase. J Cell Sci 122: 4383–4392**

Pubmed: [Author and Title](#)

Google Scholar: [Author Only](#) [Title Only](#) [Author and Title](#)

**Catalá R, Medina J, Salinas J (2011) Integration of low temperature and light signalling during cold acclimation response in Arabidopsis. Proc Natl Acad Sci USA 108: 16475–16480**

Pubmed: [Author and Title](#)

Google Scholar: [Author Only](#) [Title Only](#) [Author and Title](#)

**Chapman DJ, De-Felice J, Barber J (1983) Growth temperature effects on thylakoid membrane lipid and protein content of pea chloroplasts. Plant Physiol 72: 225–228**

Pubmed: [Author and Title](#)

Google Scholar: [Author Only](#) [Title Only](#) [Author and Title](#)

**Chen CT, Slocum RD (2008) Expression and functional analysis of aspartate transcarbamoylase and role of de novo pyrimidine synthesis in regulation of growth and development in Arabidopsis. Plant Physiol Biochem 46: 150–159**



Pubmed: [Author and Title](#)

Google Scholar: [Author Only Title Only Author and Title](#)

**Chen J, Han G, Shang C, Li J, Zhang H, Liu F, Wang J, Liu H, Zhang Y (2015): Proteomic analyses reveal differences in cold acclimation mechanisms in freezing-tolerant and freezing-sensitive cultivars of alfalfa. Front Plant Sci 6. doi: 10.3389/fpls.2015.00105.**

Pubmed: [Author and Title](#)

Google Scholar: [Author Only Title Only Author and Title](#)

**Cheng Z, Sattler S, Maeda H, Sakuragi Y, Bryant DA, DellaPenna D (2003) Highly divergent methyltransferases catalyze a conserved reaction in tocopherol and plastoquinone synthesis in cyanobacteria and photosynthetic eukaryotes. Plant Cell 15: 2343–2356**

Pubmed: [Author and Title](#)

Google Scholar: [Author Only Title Only Author and Title](#)

**Chigri F, Sippel C, Kolb M, Voithknecht UC (2009) Arabidopsis OBG-like GTPase (AtOBGL) is localized in chloroplasts and has an essential function in embryo development. Mol Plant 2: 1373–1383**

Pubmed: [Author and Title](#)

Google Scholar: [Author Only Title Only Author and Title](#)

**Chou ML, Liao WY, Wei WC, Li AYS, Chu CY, Wu CL, Liu CL, Fu TH, Lin LF (2018) The direct involvement of dark-induced Tic55 protein in chlorophyll catabolism and its indirect role in the MYB108-NAC signalling pathway during leaf senescence in Arabidopsis thaliana. Int J Mol Sci 19: 1854; doi:10.3390/ijms19071854**

Pubmed: [Author and Title](#)

Google Scholar: [Author Only Title Only Author and Title](#)

**Chow CM, Neto H, Foucart C Moore I (2008) Rab-A2 and Rab-A3 GTPases define a trans-golgi endosomal membrane domain in Arabidopsis that contributes substantially to the cell plate. Plant Cell 20: 101–123.**

Pubmed: [Author and Title](#)

Google Scholar: [Author Only Title Only Author and Title](#)

**Clough SJ, Bent AF (1998) Floral dip: a simplified method for Agrobacterium-mediated transformation of Arabidopsis thaliana. Plant J 16: 735–743**

Pubmed: [Author and Title](#)

Google Scholar: [Author Only Title Only Author and Title](#)

**Cox J, Hein MY, Lubner CA, Paron I, Nagaraj N, Mann M (2014) Accurate proteome-wide label-free quantification by delayed normalization and maximal peptide ratio extraction, termed MaxLFQ. Mol Cell Proteom 13: 2513–2526**

Pubmed: [Author and Title](#)

Google Scholar: [Author Only Title Only Author and Title](#)

**Cox J, Mann M (2008) MaxQuant enables high peptide identification rates, individualized p.p.b.-range mass accuracies and proteome-wide protein quantification. Nature Biotechnol 26: 1367–1372**

Pubmed: [Author and Title](#)

Google Scholar: [Author Only Title Only Author and Title](#)

**Crosatti C, Rizza F, Badeck FW, Mazzucotelli E, Cattivelli L (2013) Harden the chloroplast to protect the plant. Physiol Plant 147: 55–63**

Pubmed: [Author and Title](#)

Google Scholar: [Author Only Title Only Author and Title](#)

**Erling Tjus S, Lindberg Møller B, Vibe Scheller H (1998) Photosystem I is an early target of photoinhibition in barley illuminated at chilling temperatures. Plant Physiol 116: 755–764.**

Pubmed: [Author and Title](#)

Google Scholar: [Author Only Title Only Author and Title](#)

**Ferro M, Brugière S, Salvi D, Seigneurin-Berny D, Court M, Moyet L, Ramus C, Miras S, Mellal M, Le Gall S, Kieffer-Jaquinod S, Bruley C, Garin J, Joyard J, Masselon C, Rolland N (2010) AT\_CHLORO, a comprehensive chloroplast proteome database with subplastidial localization and curated information on envelope proteins. Mol Cell Proteom 9: 1063–1084**

Pubmed: [Author and Title](#)

Google Scholar: [Author Only Title Only Author and Title](#)

**Ferro M, Salvi D, Brugière S, Miras S, Kowalski S, Louwagie M, Garin J, Joyard J, Rolland N (2003) Proteomics of the chloroplast envelope membranes from Arabidopsis thaliana. Mol Cell Proteom 2: 325–345**

Pubmed: [Author and Title](#)

Google Scholar: [Author Only Title Only Author and Title](#)

**Fritsche S, Wang X, Jung C (2017) Recent advances in our understanding of tocopherol biosynthesis in plants: An overview of key genes, functions, and breeding of Vitamin E improved crops. Antioxidants (Basel) 6: E99. doi: 10.3390/antiox6040099**

Pubmed: [Author and Title](#)

Google Scholar: [Author Only Title Only Author and Title](#)

**Gao F, Zhou Y, Zhu W, Li X, Fan L, Zhang G (2009): Proteomic analysis of cold stress-responsive proteins in Thellungiella rosette leaves. Planta 230: 1033–1046**

Pubmed: [Author and Title](#)

Google Scholar: [Author Only Title Only Author and Title](#)

**Garcia C, Khan NZ, Nannmark U, Aronsson H (2010) The chloroplast protein CPSAR1, dually localized in the stroma and the inner**

**envelope membrane, is involved in thylakoid biogenesis.** *Plant J* 63: 73–85

Pubmed: [Author and Title](#)

Google Scholar: [Author Only Title Only Author and Title](#)

**Goetze TA, Patil M, Jeshen I, Bölter B, Grahl S, Soll J (2015) Oep23 forms an ion channel in the chloroplast outer envelope.** *BMC Plant Biol* 15: 47. doi: 10.1186/s12870-015-0445-1

Pubmed: [Author and Title](#)

Google Scholar: [Author Only Title Only Author and Title](#)

**Goulas E, Schubert M, Kieselbach T, Kleczkowski LA, Gardeström P, Schröder W, Hurry V (2006): The chloroplast lumen and stromal proteomes of *Arabidopsis thaliana* show differential sensitivity to short- and long-term exposure to low temperature.** *Plant J* 47: 720–734.

Pubmed: [Author and Title](#)

Google Scholar: [Author Only Title Only Author and Title](#)

**Grefen C, Donald N, Hashimoto K, Kudla J, Schumacher K, Blatt MR (2010) A ubiquitin-10 promoter-based vector set for fluorescent protein tagging facilitates temporal stability and native protein distribution in transient and stable expression studies.** *Plant J* 64: 355–365

Pubmed: [Author and Title](#)

Google Scholar: [Author Only Title Only Author and Title](#)

**Haferkamp I, Schmitz-Esser S (2012) The plant mitochondrial carrier family: functional and evolutionary aspects.** *Front Plant Sci* 3: 2 doi: 10.3389/fpls.2012.00002

Pubmed: [Author and Title](#)

Google Scholar: [Author Only Title Only Author and Title](#)

**Hemsley PA, Weimar T, Lilley KS, Dupree P, Grierson CS (2013) A proteomic approach identifies many novel palmitoylated proteins in *Arabidopsis*.** *New Phytol* 197: 805–814

Pubmed: [Author and Title](#)

Google Scholar: [Author Only Title Only Author and Title](#)

**Hincha DK (2008) Effects of alpha-tocopherol (vitamin E) on the stability and lipid dynamics of model membranes mimicking the lipid composition of plant chloroplast membranes.** *FEBS Lett* 582: 3687–3692

Pubmed: [Author and Title](#)

Google Scholar: [Author Only Title Only Author and Title](#)

**Höfgen R, Willmitzer L (1988) Storage of competent cells for *Agrobacterium* transformation.** *Nucleic Acids Res* 16: 9877

Pubmed: [Author and Title](#)

Google Scholar: [Author Only Title Only Author and Title](#)

**Käll L, Storey JD, MacCoss MJ, Noble WS (2008) Posterior error probabilities and false discovery rates: two sides of the same coin.** *J Proteome Res* 7: 40–44

Pubmed: [Author and Title](#)

Google Scholar: [Author Only Title Only Author and Title](#)

**Kampfenkel K, Möhlmann T, Batz O, van Montagu M, Inzé D, Neuhaus HE (1995) Molecular characterization of an *Arabidopsis thaliana* cDNA encoding a novel putative adenylate translocator of higher plants.** *FEBS Lett* 374: 351–355

Pubmed: [Author and Title](#)

Google Scholar: [Author Only Title Only Author and Title](#)

**Kaplan F, Guy CL (2004)  $\beta$ -Amylase induction and the protective role of maltose during temperature shock.** *Plant Physiol* 135: 1674–1684

Pubmed: [Author and Title](#)

Google Scholar: [Author Only Title Only Author and Title](#)

**Kaplan F, Sung DY, Guy CL (2006) Roles of beta-amylase and starch breakdown during temperatures stress.** *Physiol Planta* 126: 120–128

Pubmed: [Author and Title](#)

Google Scholar: [Author Only Title Only Author and Title](#)

**Karim S, Aronsson H (2014) The puzzle of chloroplast vesicle transport – involvement of GTPases.** *Front Plant Sci* 5: 472 doi: 10.3389/fpls.2014.00472

Pubmed: [Author and Title](#)

Google Scholar: [Author Only Title Only Author and Title](#)

**Khanal N, Bray GE, Grisnich A, Moffatt BA, Gray GR (2017) Differential mechanisms of photosynthetic acclimation to light and low temperature in *Arabidopsis* and the extremophile *Eutrema salsaugineum*.** *Plants (Basel)* 6: (3). pii: E32. doi: 10.3390/plants6030032

Pubmed: [Author and Title](#)

Google Scholar: [Author Only Title Only Author and Title](#)

**Kim H, Botelho SC, Park K, Kim H (2015) Use of carbonate extraction in analyzing moderately hydrophobic transmembrane proteins in the mitochondrial inner membrane.** *Protein Sci* 24: 2063–2069

Pubmed: [Author and Title](#)

Google Scholar: [Author Only Title Only Author and Title](#)

**Kirchberger S, Tjaden J, Neuhaus HE (2008) Characterization of the Arabidopsis Brittle1 transport protein and impact of reduced activity on plant metabolism. Plant J 56: 51–63**

Pubmed: [Author and Title](#)

Google Scholar: [Author Only Title Only Author and Title](#)

**Kleine T, Leister D (2013) Retrograde signals galore. Front Plant Sci 4: 45 doi: 10.3389/fpls.2013.00045**

Pubmed: [Author and Title](#)

Google Scholar: [Author Only Title Only Author and Title](#)

**Knaupp M, Mishra KB, Nedbal L, Heyer AG (2011) Evidence for a role of raffinose in stabilizing photosystem II during freeze-thaw cycles. Planta 234: 477–486**

Pubmed: [Author and Title](#)

Google Scholar: [Author Only Title Only Author and Title](#)

**Kosová K, Vítámvás P, Planchon S, Renaut J, Vanková R, Prášil IT (2013) Proteome analysis of cold response in spring and winter wheat (*Triticum aestivum*) crowns reveals similarities in stress adaptation and differences in regulatory processes between the growth habits. J Proteome Res 12: 4830–4845.**

Pubmed: [Author and Title](#)

Google Scholar: [Author Only Title Only Author and Title](#)

**Kötting O, Kossmann J, Zeeman SC, Lloyd JR (2010) Regulation of starch metabolism: the age of enlightenment? Curr Opin Plant Biol 13: 321–329**

**Kunst L (1998) Preparation of physiologically active chloroplasts from Arabidopsis. Methods Mol Biol 82: 43–48**

Pubmed: [Author and Title](#)

Google Scholar: [Author Only Title Only Author and Title](#)

**Lai CP, Huang LM, Chen LFO, Chan MT, Shaw JF (2017) Genome-wide analysis of GDSL-type esterases/lipases in Arabidopsis. Plant Mol Biol 95: 181–197**

Pubmed: [Author and Title](#)

Google Scholar: [Author Only Title Only Author and Title](#)

**Larsson O, Wahlestedt C, Timmons JA (2005) Considerations when using the significance analysis of microarrays (SAM) algorithm. BMC Bioinform 6: 129**

Pubmed: [Author and Title](#)

Google Scholar: [Author Only Title Only Author and Title](#)

**Lee JY, Lee HS, Song JY, Jung YJ, Reinbothe S, Park YI, Lee SY, Pai HS (2013) Cell growth defect factor1/chaperone-like protein of POR1 plays a role in stabilization of light-dependent protochlorophyllide oxidoreductase in *Nicotiana benthamiana* and Arabidopsis. Plant Cell 25: 3944–3960**

Pubmed: [Author and Title](#)

Google Scholar: [Author Only Title Only Author and Title](#)

**Li N, Gügel IL, Giavalisco P, Zeisler V, Schreiber L, Soll J, Philippar K (2015a) FAX1, a novel membrane protein mediating plastid fatty acid export. PLoS Biol 13: e1002053**

Pubmed: [Author and Title](#)

Google Scholar: [Author Only Title Only Author and Title](#)

**Li Q, Zheng Q, Shen W, Cram D, Fowler DB, Wei Y, Zou J (2015b) Understanding the Biochemical Basis of Temperature-Induced Lipid Pathway Adjustments in Plants. Plant Cell 27: 86–103**

Pubmed: [Author and Title](#)

Google Scholar: [Author Only Title Only Author and Title](#)

**Li-Beisson Y, Shorrosh B, Beisson F, Andersson MX, Arondel V, Bates PD, Baud S, Bird D, Debono A, Durrett TP, Franke RB, Graham IA, Katayama K, Kelly AA, Larson T, Markham JE, Miquel M, Molina I, Nishida I, Rowland O, Samuels L, Schmid KM, Wada H, Welti R, Xu C, Zallot R, Ohlrogge J (2010) Acyl-lipid metabolism. The Arabidopsis book 8: e0133**

Pubmed: [Author and Title](#)

Google Scholar: [Author Only Title Only Author and Title](#)

**Logemann E, Birkenbihl RP, Ülker B, Somssich IE (2006) An improved method for preparing *Agrobacterium* cells that simplifies the Arabidopsis transformation protocol. Plant Methods 2: 16 doi: 10.1186/1746-4811-2-16**

Pubmed: [Author and Title](#)

Google Scholar: [Author Only Title Only Author and Title](#)

**Lu B, Benning C (2009) A 25-Amino Acid Sequence of the Arabidopsis TGD2 Protein Is Sufficient for Specific Binding of Phosphatidic Acid. J Biol Chem 284: 17420–17427**

Pubmed: [Author and Title](#)

Google Scholar: [Author Only Title Only Author and Title](#)

**Maeda H, Song W, Sage TL, DellaPenna D (2006) Tocopherols play a crucial role in low-temperature adaptation and Phloem loading in Arabidopsis. Plant Cell 18: 2710–2732**

Pubmed: [Author and Title](#)

Google Scholar: [Author Only Title Only Author and Title](#)

**Maurer-Stroh S, Eisenhaber F (2005) Refinement and prediction of protein prenylation motifs. Genome Biol 6: R55**

Pubmed: [Author and Title](#)

Google Scholar: [Author Only Title Only Author and Title](#)

**McFadden GI (1999) Endosymbiosis and evolution of the plant cell. *Curr Opin Plant Biol* 2: 513–519**

Pubmed: [Author and Title](#)

Google Scholar: [Author Only Title Only Author and Title](#)

**Mène-Saffrané L (2017) Vitamin E biosynthesis and its regulation in plants. *Antioxidants (Basel)* 7(1) pii: E2. doi: 10.3390/antiox7010002**

Pubmed: [Author and Title](#)

Google Scholar: [Author Only Title Only Author and Title](#)

**Mock HP, Grimm B (1997) Reduction of uroporphyrinogen decarboxylase by antisense RNA expression affects activities of other enzymes involved in tetrapyrrole biosynthesis and leads to light-dependent necrosis. *Plant Physiol* 113: 1101–1112**

Pubmed: [Author and Title](#)

Google Scholar: [Author Only Title Only Author and Title](#)

**Moellering ER, Muthan B, Benning C (2010) Freezing tolerance in plants requires lipid remodeling at the outer chloroplast membrane. *Science* 330: 226–228**

Pubmed: [Author and Title](#)

Google Scholar: [Author Only Title Only Author and Title](#)

**Morré DJ, Sellén G, Sundqvist C, Sandelius AS (1991) Stromal low temperature compartment derived from the inner membrane of the chloroplast envelope. *Plant Physiol* 97: 1558–1564**

Pubmed: [Author and Title](#)

Google Scholar: [Author Only Title Only Author and Title](#)

**Munné-Bosch S (2002) The function of tocopherols and tocotrienols in plants. *Crit Rev Plant Sci* 21: 31–57**

Pubmed: [Author and Title](#)

Google Scholar: [Author Only Title Only Author and Title](#)

**Nägele T, Heyer AG (2013) Approximating subcellular organisation of carbohydrate metabolism during cold acclimation in different natural accessions of *Arabidopsis thaliana*. *New Phytol* 198: 777–787**

Pubmed: [Author and Title](#)

Google Scholar: [Author Only Title Only Author and Title](#)

**Ngaki MN, Louie GV, Philippe RN, Manning G, Pojer F, Bowman ME, Li L, Larsen E, Wurtele ES, Noel JP (2012) Evolution of the chalcone-isomerase fold from fatty-acid binding to stereospecific catalysis. *Nature* 485: 530–533**

Pubmed: [Author and Title](#)

Google Scholar: [Author Only Title Only Author and Title](#)

**Niittylä T, Messerli G, Trevisan M, Chen J, Smith AM, Zeeman SC (2004) A previously unknown maltose transporter essential for starch degradation in leaves. *Science* 303: 87–89**

Pubmed: [Author and Title](#)

Google Scholar: [Author Only Title Only Author and Title](#)

**Olejnik D, Gogolewski M, Nogala-Kałucka M (1997) Isolation and some properties of plastochromanol-8. *Food* 41: 101–104**

Pubmed: [Author and Title](#)

Google Scholar: [Author Only Title Only Author and Title](#)

**Olinares PDB, Kim J, van Wijk KJ (2011) The Clp protease system; a central component of the chloroplast protease network. *Biochim Biophys Acta* 1807: 999–1011**

Pubmed: [Author and Title](#)

Google Scholar: [Author Only Title Only Author and Title](#)

**Patzke K, Prananingrum P, Klemens PAW, Trentmann O, Rodrigues CM, Keller I, Fernie AR, Geigenberger P, Bölter B, Lehmann M, Schmitz-Esser S, Pommerrenig B, Haferkamp I, Neuhaus HE (2019) The plastidic sugar transporter pSuT influences flowering and affects cold responses. *Plant Physiol* 179: 569–587**

Pubmed: [Author and Title](#)

Google Scholar: [Author Only Title Only Author and Title](#)

**Perez-Riverol Y, Csordas A, Bai J, Bernal-Llinares M, Hewapathirana S, Kundu DJ, Inuganti A, Griss J, Mayer G, Eisenacher M, Pérez E, Uszkoreit J, Pfeuffer J, Sachsenberg T, Yilmaz S, Tiwary S, Cox J, Audain E, Walzer M, Jarnuczak AF, Ternent T, Brazma A, Vizcaino JA (2019) The PRIDE database and related tools and resources in 2019: improving support for quantification data. *Nucleic Acids Res* 47(D1): D442–D450**

Pubmed: [Author and Title](#)

Google Scholar: [Author Only Title Only Author and Title](#)

**Pfalz J, Liebers M, Hirth M, Grübler B, Holtzegel U, Schröter Y, Dietzel L, Pfannschmidt T (2012) Environmental control of plant nuclear gene expression by chloroplast redox signals. *Front Plant Sci* 3:257. doi: 10.3389/fpls.2012.00257**

Pubmed: [Author and Title](#)

Google Scholar: [Author Only Title Only Author and Title](#)

**Pommerrenig B, Ludwig F, Cvetkovic J, Trentmann O, Klemens PAW, Neuhaus HE (2018) In concert: orchestrated changes in carbohydrate homeostasis are critical for plant abiotic stress tolerance. *Plant Cell Physiol* 59: 1290–1299**

Pubmed: [Author and Title](#)

Google Scholar: [Author Only](#) [Title Only](#) [Author and Title](#)

**Purdy SJ, Bussell JD, Nunn CP, Smith SM (2013) Leaves of the Arabidopsis maltose exporter1 mutant exhibit a metabolic profile with features of cold acclimation in the warm. PLoS one 8 (11): e79412. doi: 10.1371/journal.pone.0079412**

Pubmed: [Author and Title](#)

Google Scholar: [Author Only](#) [Title Only](#) [Author and Title](#)

**Rappsilber J, Mann M, Ishihama Y (2007) Protocol for micro-purification, enrichment, pre-fractionation and storage of peptides for proteomics using StageTips. Nature Prot 2: 1896–1906**

Pubmed: [Author and Title](#)

Google Scholar: [Author Only](#) [Title Only](#) [Author and Title](#)

**Reinhold T, Alawady A, Grimm B, Beran KC, Jahns P, Conrath U, Bauer J, Reiser J, Melzer M, Jeblick W, Neuhaus HE (2007) Limitation of nocturnal import of ATP into Arabidopsis chloroplasts leads to photooxidative damage. Plant J 50: 293–304**

Pubmed: [Author and Title](#)

Google Scholar: [Author Only](#) [Title Only](#) [Author and Title](#)

**Reiser J, Linka N, Lemke L, Jeblick W, Neuhaus HE (2004) Molecular physiological analysis of the two plastidic ATP/ADP transporters from Arabidopsis. Plant Physiol 136: 3524–3536**

Pubmed: [Author and Title](#)

Google Scholar: [Author Only](#) [Title Only](#) [Author and Title](#)

**Rekarte-Cowie I, Ebshish OS, Mohamed KS, Pearce RS (2008) Sucrose helps regulate cold acclimation of Arabidopsis thaliana. J Exp Bot 59: 4205–4217**

Pubmed: [Author and Title](#)

Google Scholar: [Author Only](#) [Title Only](#) [Author and Title](#)

**Ren J, Wen L, Gao X, Jin C, Xue Y, Yao X (2008) CSS-Palm 2.0: an updated software for palmitoylation sites prediction. Protein Eng Des Sel 21: 639–644**

Pubmed: [Author and Title](#)

Google Scholar: [Author Only](#) [Title Only](#) [Author and Title](#)

**Rocco M, Arena S, Renzone G, Scippa GS, Lomaglio T, Verrillo F, Scaloni A, Marra M (2013): Proteomic analysis of temperature stress-responsive proteins in Arabidopsis thaliana rosette leaves. Mol Biosyst 9: 1257–1267**

Pubmed: [Author and Title](#)

Google Scholar: [Author Only](#) [Title Only](#) [Author and Title](#)

**Röhl T, Motzkus M, Soll J (1999) The outer envelope protein OEP24 from pea chloroplasts can functionally replace the mitochondrial VDAC in yeast. FEBS lett 460: 491–494**

Pubmed: [Author and Title](#)

Google Scholar: [Author Only](#) [Title Only](#) [Author and Title](#)

**Roston RL, Gao J, Murcha MW, Whelan J, Benning C (2012) TGD1, -2, and -3 proteins involved in lipid trafficking form ATP-binding cassette (ABC) transporter with multiple substrate-binding proteins. J Biol Chem 287: 21406–21415**

Pubmed: [Author and Title](#)

Google Scholar: [Author Only](#) [Title Only](#) [Author and Title](#)

**Ryoo N, Eom JS, Kim HB, Vo BT, Lee SW, Hahn TR, Jeon JS (2013) Expression and functional analysis of rice plastidic maltose transporter, OsMEX1. J Korean Soc Appl Biol Chem 56: 149–155**

Pubmed: [Author and Title](#)

Google Scholar: [Author Only](#) [Title Only](#) [Author and Title](#)

**Sánchez-Fernández R, Davies TG, Coleman JO, Rea PA (2001) The Arabidopsis thaliana ABC protein superfamily, a complete inventory. J Biol Chem 276: 30231–30244**

Pubmed: [Author and Title](#)

Google Scholar: [Author Only](#) [Title Only](#) [Author and Title](#)

**Schneider T, Keller F (2009) Raffinose in chloroplasts is synthesized in the cytosol and transported across the chloroplast envelope. Plant Cell Physiol 50: 2174–2182**

Pubmed: [Author and Title](#)

Google Scholar: [Author Only](#) [Title Only](#) [Author and Title](#)

**Schulze WX, Schneider T, Starck S, Martinoia E, Trentmann O (2012) Cold acclimation induces changes in Arabidopsis tonoplast protein abundance and activity and alters phosphorylation of tonoplast monosaccharide transporters. Plant J 69: 529–541**

Pubmed: [Author and Title](#)

Google Scholar: [Author Only](#) [Title Only](#) [Author and Title](#)

**Serbinova E, Kagan V, Han D, Packer L (1991) Free radical recycling and intramembrane mobility in the antioxidant properties of alpha-tocopherol and alpha-tocotrienol. Free Radic. Biol. Med 10: 263–275**

Pubmed: [Author and Title](#)

Google Scholar: [Author Only](#) [Title Only](#) [Author and Title](#)

**Sicher R (2011) Carbon partitioning and the impact of starch deficiency on the initial response of Arabidopsis to chilling temperatures. Plant Sci 181: 167–176.**

Pubmed: [Author and Title](#)



Google Scholar: [Author Only](#) [Title Only](#) [Author and Title](#)

**Strand A, Hurry V, Gustafsson P, Gardeström P (1997) Development of Arabidopsis thaliana leaves at low temperatures releases the suppression of photosynthesis and photosynthetic gene expression despite the accumulation of soluble carbohydrates. Plant J 12: 605–614**

Pubmed: [Author and Title](#)

Google Scholar: [Author Only](#) [Title Only](#) [Author and Title](#)

**Sun Q, Zybaïlov B, Majeran W, Friso G, Olinares PDB, van Wijk KJ (2009) PPDB, the plant proteomics database at cornell. Nucleic Acids Res 37: D969-74. doi: 10.1093/nar/gkn654.**

Pubmed: [Author and Title](#)

Google Scholar: [Author Only](#) [Title Only](#) [Author and Title](#)

**Terry MJ, Smith AG (2013) A model for tetrapyrrole synthesis as the primary mechanism for plastid-to-nucleus signaling during chloroplast biogenesis. Front Plant Sci 4: 14. doi: 10.3389/fpls.2013.00014**

Pubmed: [Author and Title](#)

Google Scholar: [Author Only](#) [Title Only](#) [Author and Title](#)

**Tewari KA, Tripathy CB (1998) Temperature-stress-induced impairment of chlorophyll biosynthetic reactions in cucumber and wheat. Plant Physiol 117: 851–858**

Pubmed: [Author and Title](#)

Google Scholar: [Author Only](#) [Title Only](#) [Author and Title](#)

**Tewari KA, Tripathy CB (1998) Temperature-stress-induced impairment of chlorophyll biosynthetic reactions in cucumber and wheat. Plant Physiol 117: 851–858**

Pubmed: [Author and Title](#)

Google Scholar: [Author Only](#) [Title Only](#) [Author and Title](#)

**Tewari KA, Tripathy CB (1999) Acclimation of chlorophyll biosynthetic reactions to temperature stress in cucumber (Cucumis sativus L.). Planta 208: 431–437**

Pubmed: [Author and Title](#)

Google Scholar: [Author Only](#) [Title Only](#) [Author and Title](#)

**Tjaden J, Möhlmann T, Kampfenkel K, Neuhaus, Henrichs G and H. Ekkehard (1998) Altered plastidic ATP/ADP-transporter activity influences potato (Solanum tuberosum L.) tuber morphology, yield and composition of tuber starch. Plant J 16: 531–540**

Pubmed: [Author and Title](#)

Google Scholar: [Author Only](#) [Title Only](#) [Author and Title](#)

**Trentmann O, Haferkamp I (2013) Current progress in tonoplast proteomics reveals insights into the function of the large central vacuole. Front Plant Sci 4: 34. doi: 10.3389/fpls.2013.00034**

Pubmed: [Author and Title](#)

Google Scholar: [Author Only](#) [Title Only](#) [Author and Title](#)

**Trentmann O, Jung B, Neuhaus HE, Haferkamp I (2008) Nonmitochondrial ATP/ADP transporters accept phosphate as third substrate. J Bio Chem 283: 36486–36493**

Pubmed: [Author and Title](#)

Google Scholar: [Author Only](#) [Title Only](#) [Author and Title](#)

**van Wijk KJ, Kessler F (2017) Plastoglobuli: Plastid microcompartments with integrated functions in metabolism, plastid developmental transitions, and environmental adaptation. Annu. Rev. Plant Bio 68: 253–289**

Pubmed: [Author and Title](#)

Google Scholar: [Author Only](#) [Title Only](#) [Author and Title](#)

**Wanner LA, Junttila O (1999) Cold-induced freezing tolerance in Arabidopsis. Plant Physiol 120: 391–400**

Pubmed: [Author and Title](#)

Google Scholar: [Author Only](#) [Title Only](#) [Author and Title](#)

**Weber A, Servaites JC, Geiger DR, Kofler H, Hille D, Gröner F, Hebbeker U, Flüggé UI (2000) Identification, purification, and molecular cloning of a putative plastidic glucose translocator. Plant Cell 12: 787–802**

Pubmed: [Author and Title](#)

Google Scholar: [Author Only](#) [Title Only](#) [Author and Title](#)

**Weber APM, Schwacke R, Flüggé UI (2005) Solute transporters of the plastid envelope membrane. Annu. Rev. Plant Bio 56: 133–164**

Pubmed: [Author and Title](#)

Google Scholar: [Author Only](#) [Title Only](#) [Author and Title](#)

**Westphal S, Soll J, Voithknecht UC (2001) A vesicle transport system inside chloroplasts. FEBS letters 506: 257–261**

Pubmed: [Author and Title](#)

Google Scholar: [Author Only](#) [Title Only](#) [Author and Title](#)

**Witz S, Jung B, Fürst S, Möhlmann T (2012) De novo pyrimidine nucleotide synthesis mainly occurs outside of plastids, but a previously undiscovered nucleobase importer provides substrates for the essential salvage pathway in Arabidopsis. Plant Cell 24: 1549–1559**

Pubmed: [Author and Title](#)

Google Scholar: [Author Only](#) [Title Only](#) [Author and Title](#)

**Yano R, Nakamura M, Yoneyama T, Nishida I (2005) Starch-related  $\alpha$ -glucan/water dikinase is involved in the cold-induced development of freezing tolerance in Arabidopsis. Plant Physiol 138: 837–846**

Pubmed: [Author and Title](#)

Google Scholar: [Author Only](#) [Title Only](#) [Author and Title](#)

**Zimmer D, Schneider K, Sommer F, Schroda M, Mühlhaus T (2018) Artificial intelligence understands peptide observability and assists with absolute protein quantification. Front Plant Sci 9:1559. doi: 10.3389/fpls.2018.01559**

Pubmed: [Author and Title](#)

Google Scholar: [Author Only](#) [Title Only](#) [Author and Title](#)
